# Supplementary material for: Early and delayed STAT1-dependent responses drive local trained immunity of macrophages in the spleen
Source: eLife. 2025 Jan 16;13:RP100922. doi: 10.7554/eLife.100922 (PMC11737870; doi:10.7554/eLife.100922)
Supplement: Supplementary file 1. — (a) Training induced DEGs from single-cell experiment. For each population (CM, NCM, mcDC, and NK cells), significantly differentially expressed genes (10% FDR) between naive and trained cells are presented, with log-ratio values, and corresponding p-value and q-value.(b) Training induced DEGs from the kinetics experiment. Total splenocyte log2-ratio expression from both naïve (PBS) and trained (BCG) vaccinated mice at days 3, 14, 30, 45, and 40 days after vaccination. Replicates are marked at the end of the sample name.(c) Significantly expressed DEGs (10% FDR) between naïve and trained splenic CM, NCM, and Tdtm+/- RPM. Log-ratio values, and corresponding p-value and q-values presented.(d) Training induced significant DEGs (10% FDR) in total splenocytes, between naïve and trained mice, with and without Type I and II interferon inhibition. Values are log2-ratio expression per replicate. Replicates are marked at the end of the sample name.(e) Training induced significant DEGs (10% FDR) in total splenocytes, between naive and trained mice, with and without Fedratinib inhibition. Values are log2-ratio expression per replicate. Replicates are marked at the end of the sample name. [file elife-100922-supp1.xlsx]

## Sheet: supplementary file 1a
Table S1: Training induced DEGs from single-cell experiment. For each population (CM, NCM, mcDC, and NK cells), significantly differentially expressed genes (10% FDR) between naive and trained cells are presented, with log-ratio values, and corresponding p-value and q-value.
CM				NCM				mcDC2				NK
sig. genes	log-ratio	p-val	q-val	sig. genes	log-ratio	p-val	q-val	sig. genes	log-ratio	p-val	q-val	sig. genes	log-ratio	p-val	q-val
Stat1	1.09173	6.5788e-43	4.3953e-39	Apoe	-1.26971	3.50289e-12	1.4286e-08	Stat1	1.02772	3.69349e-26	2.38673e-22	S100a9	-0.636223	8.37282e-07	0.00389169
Gbp2	0.912969	1.7217e-39	5.75134e-36	Stat1	1.10913	6.5233e-12	1.4286e-08	H2-K1	0.739932	1.78193e-18	5.75742e-15	Ccl5	0.644638	5.81885e-06	0.013523
Ngp	-0.424646	1.45745e-28	3.24574e-25	Cd74	1.16934	1.59692e-09	2.3315e-06	B2m;BC002288	0.589406	5.99128e-15	1.29052e-11	Apoe	-0.379621	1.84132e-05	0.0285282
Apoe	-0.939318	2.6957e-22	4.50249e-19	Gbp2	0.650697	1.7134e-08	1.6972e-05	Gbp2	0.521929	1.1034e-14	1.78253e-11	Tmsb4x	0.389079	5.34723e-05	0.0621349
Serpina3f;Serpina3g	0.506883	2.05026e-19	2.73955e-16	Ly6i	0.708466	1.93744e-08	1.6972e-05	Ly6e	0.784492	1.35183e-13	1.74711e-10	Mrps14	0.240523	7.61753e-05	0.0708126
S100a9	-0.403832	7.22008e-19	8.03956e-16	Serpina3f;Serpina3g	0.570117	4.75568e-08	3.47165e-05	Cd209a	-0.468418	6.65783e-13	7.17048e-10	IIGP;Iigp1	0.185118	0.000110785	0.0858217
IIGP;Iigp1	0.355479	1.00567e-18	9.59842e-16	Ly6a	0.695337	9.0796e-07	0.000568123	Samhd1	0.673065	1.0167e-12	9.38555e-10	B2m;BC002288	0.457912	0.000129941	0.086281
Camp	-0.214289	3.0318e-16	2.53193e-13	Hspa1a	0.607981	1.15905e-06	0.000634577	Camp	-0.244811	3.0719e-12	2.27094e-09
Ly6i	0.434921	5.01543e-14	3.72312e-11	Fam26f	0.456694	1.63259e-06	0.000794527	Ngp	-0.340429	3.16286e-12	2.27094e-09
Fam26f	0.396714	7.28517e-14	4.34825e-11	Gbp10;Mpa2l;Gbp6;Gbp4	0.375931	2.11946e-06	0.000928322	Ly6a	0.556476	3.79944e-12	2.4552e-09
Ly6a	0.419715	7.49444e-14	4.34825e-11	Samhd1	0.776262	3.44196e-06	0.00137053	Plac8	0.767324	7.81746e-12	4.5924e-09
Irf1	0.426751	7.81006e-14	4.34825e-11	Irf1	0.474732	3.90141e-06	0.00142402	Psap	0.685901	9.2954e-12	5.00557e-09
Cxcl9	0.49542	2.32507e-12	1.19491e-09	Gbp3	0.32248	1.39527e-05	0.00415466	S100a9	-0.390902	1.27167e-11	6.32119e-09
H2-K1	0.558725	4.87045e-12	2.32425e-09	Apobec3	0.357089	1.40338e-05	0.00415466	Ly6i	0.486115	1.61441e-11	7.45164e-09
Psmb8	0.535669	7.35879e-12	3.24403e-09	Camp	-0.352747	1.42283e-05	0.00415466	AW112010	0.394885	5.32796e-11	2.29528e-08
Lyz1;Lyz2	-0.623725	7.76896e-12	3.24403e-09	H2-Q7;H2-Q9;H2-Q6;Bat1a	0.551855	1.90995e-05	0.00522848	Tmem176b	-0.573396	5.20146e-10	2.10074e-07
Cfb;C2	0.294228	1.13711e-11	4.46886e-09	S100a9	-0.441097	2.11102e-05	0.00543899	Cst3	0.674195	1.80247e-09	6.85152e-07
Plac8	0.618708	3.57917e-11	1.27195e-08	H2-Ab1	0.674183	3.41226e-05	0.00830316	Fcgr4	0.434204	2.33727e-09	8.3908e-07
Pla2g16	0.260663	3.61729e-11	1.27195e-08	S100a8	-0.321719	7.15058e-05	0.016484	Flt3	-0.292581	5.7517e-09	1.95618e-06
Psmb9	0.369203	5.98619e-11	1.99969e-08	Ngp	-0.313657	0.000130797	0.0286446	Psmb8	0.516941	2.76449e-08	8.93207e-06
Tap1	0.40241	8.3444e-11	2.65471e-08	H2-T10;H2-T22;H2-T9;H2-t9;H2-T23	0.487663	0.000145467	0.0303402	Cd74	-0.428778	6.09843e-08	1.87657e-05
Cd74	0.662255	4.45752e-10	1.35367e-07	Cxcl9	0.126209	0.000169341	0.033238	Olfr56;Ifi47	0.302243	9.00033e-08	2.5861e-05
Dnase1l3	0.300344	5.37209e-10	1.56048e-07	Clec4a2	-0.2332	0.000175188	0.033238	H2-Aa;AK171153	-0.536278	9.20461e-08	2.5861e-05
Irgm1	0.293728	1.49474e-09	4.16097e-07	Plac8	0.748123	0.000186877	0.033238	IIGP;Iigp1	0.238632	1.68664e-07	4.54127e-05
Cxcl10	0.374895	2.07185e-09	5.5368e-07	Ripk3	0.218836	0.000189714	0.033238	Txn1	0.35435	1.82242e-07	4.71059e-05
Fgl2	0.331772	2.95781e-09	7.60042e-07	Smpdl3b	0.374803	0.000215098	0.0362357	Pla2g16	0.229149	3.40039e-07	8.45129e-05
AW112010	0.332195	3.29669e-09	8.15747e-07	H2-K1	0.647335	0.000235324	0.0381748	Hspa1a	0.344292	4.03683e-07	9.66147e-05
Gbp3	0.267849	4.52164e-09	1.0789e-06	Kiaa0028;Lars2	0.52843	0.000249906	0.0390924	Spn	0.39888	4.39342e-07	9.91758e-05
Trf	-0.269269	1.3252e-08	3.05298e-06	H2-DMb1;H2-DMb2	0.257067	0.000342777	0.0517711	Prdx5	0.421647	4.53047e-07	9.91758e-05
Ass1	0.142477	1.61434e-08	3.59513e-06	Sla	0.356796	0.000574444	0.0838689	Slamf7	-0.351262	4.60426e-07	9.91758e-05
Txn1	0.384814	1.92759e-08	4.15426e-06					Fgl2	0.39069	5.6047e-07	0.000116831
Tapbp	0.403089	2.31792e-08	4.83938e-06					Tap1	0.391131	6.97735e-07	0.000140899
AK153212	0.430296	4.0107e-08	8.11985e-06					Cxcl9	0.224743	1.15942e-06	0.000227036
Samhd1	0.465517	5.06402e-08	9.9508e-06					Zbp1	0.275607	1.65626e-06	0.00030998
Igtp;Irgm2	0.304077	6.73474e-08	1.28557e-05					B144;Lst1	0.426834	1.67894e-06	0.00030998
Gbp10;Mpa2l;Gbp6;Gbp4	0.253151	7.16664e-08	1.33001e-05					Fcer1g	0.482446	3.84569e-06	0.000690302
Ifi205	0.245338	1.14728e-07	2.07161e-05					Trappc5	-0.222215	4.06041e-06	0.000701182
Irg1	0.182075	1.57586e-07	2.77062e-05					Calm1	0.476772	4.12332e-06	0.000701182
H2-Q7;H2-Q9;H2-Q6;Bat1a	0.293862	1.90331e-07	3.26052e-05					Irf1	0.294698	4.29016e-06	0.000710847
B2m;BC002288	0.313214	2.41608e-07	4.03546e-05					Gm8909;H2-Q1;H2-D1;H2-B2	0.388159	4.52412e-06	0.000718586
Ccr2	-0.452616	2.80052e-07	4.56348e-05					S100a8	-0.224576	4.55927e-06	0.000718586
Gm4951	0.113682	3.13957e-07	4.99416e-05					Igtp;Irgm2	0.279415	5.76441e-06	0.000886895
H2-Eb1	0.384487	6.64855e-07	0.0001033					H2-Q7;H2-Q9;H2-Q6;Bat1a	0.34776	7.14582e-06	0.00107387
Olfr56;Ifi47	0.316594	7.05798e-07	0.000107169					Psme1	0.183281	8.28517e-06	0.00121679
Ly6c2	0.564885	8.01859e-07	0.000119049					Treml4	0.296677	1.37099e-05	0.00196874
Nlrc5	0.151265	9.42164e-07	0.000136839					Irgm1	0.271478	1.5603e-05	0.00219188
H2-Ab1	0.43052	1.34171e-06	0.000190722					Tkt	0.32073	1.93466e-05	0.00265995
Ccl9	-0.373981	1.90304e-06	0.000264879					Ear2;Ear3	0.340418	2.02542e-05	0.00272672
Zbp1	0.28449	1.9839e-06	0.000270498					Msn	0.38509	2.71768e-05	0.00358401
Rnaseh1;Rnh1	0.23572	2.24387e-06	0.000299826					Gbp10;Mpa2l;Gbp6;Gbp4	0.216429	2.87709e-05	0.00365954
Tnfaip2	0.256821	3.07304e-06	0.000402569					Gm15427;Rpl18a;Snora68	-0.299443	2.88822e-05	0.00365954
Tmsb10	0.317176	3.59307e-06	0.00046164					Psmb10	0.251419	3.05131e-05	0.00379184
Ccl6	-0.41053	3.75435e-06	0.00047326					Cox7b	0.259603	3.55066e-05	0.00432913
Lgals1	0.298168	5.86524e-06	0.000725661					Gm12250	0.158455	3.83648e-05	0.00452869
Marcksl1	0.167733	6.03935e-06	0.000733616					Egr1	-0.240421	3.8545e-05	0.00452869
Gbp5;Gbp1	0.133248	7.90257e-06	0.000942804					Tmem176a	-0.275477	5.06217e-05	0.00584139
Il1rn	0.131548	8.44095e-06	0.000989368					Ceacam1	0.236825	5.5789e-05	0.00632471
Ahnak	-0.318848	9.4898e-06	0.00109313					Smpdl3b	0.18261	5.9718e-05	0.00657763
Glrx	0.195908	9.71451e-06	0.00110004					Ltf	-0.0757934	6.10304e-05	0.00657763
Psap	0.361129	1.02731e-05	0.00112649					Clec4a3	0.254436	6.13688e-05	0.00657763
C3	0.336185	1.02853e-05	0.00112649					Pla2g7	0.26109	6.20915e-05	0.00657763
Cx3cr1	-0.29351	1.175e-05	0.00126616					Ptprc	-0.390325	6.71949e-05	0.00700053
H2-Aa;AK171153	0.398401	1.31537e-05	0.00139492					Ace	0.320662	6.82503e-05	0.00700053
Rplp1	0.325641	1.35876e-05	0.00141842					Serpina3f;Serpina3g	0.299326	7.19156e-05	0.00721886
Il2rg	0.270672	1.48854e-05	0.00152999					Apoe	-0.288965	7.26131e-05	0.00721886
Rpl13a	0.296331	1.5954e-05	0.00161498					Dscam	-0.0994658	7.43473e-05	0.00725421
Rps20	0.299959	1.81846e-05	0.0018133					Txnip	-0.306361	7.52138e-05	0.00725421
Klf13	-0.280807	2.14449e-05	0.00210697					Cfb;C2	0.157588	8.15141e-05	0.00774623
Tspo	0.290115	2.48653e-05	0.00240761					Ak2	0.202015	8.67627e-05	0.00812551
H2-T10	0.28411	2.61606e-05	0.00249684					Ccl9	-0.248988	9.2143e-05	0.00850611
Btg2	-0.188397	2.86853e-05	0.00269924					Marveld1	-0.159783	0.000101421	0.00923077
Tap2	0.13257	3.54073e-05	0.0032855					Ifitm3	0.395123	0.00012399	0.0111281
Hpgd	-0.187487	3.99553e-05	0.00361776					Aif1	0.248067	0.000164018	0.014519
Rps8;Snord38a;Snord55	0.280092	4.00709e-05	0.00361776					Rplp0	-0.320494	0.000166959	0.0145796
Cd300a	-0.273183	4.10252e-05	0.00365452					Clec10a	-0.0857448	0.00018635	0.0160559
Tmem176b	-0.208491	4.91585e-05	0.00432142					Cox17	0.181061	0.000207198	0.0174337
Apaf1	0.128625	5.03517e-05	0.00436883					H2-Ab1	-0.37688	0.000207737	0.0174337
Sec61b	0.244042	5.26913e-05	0.00451322					Ywhaz	0.233722	0.000245155	0.0203101
Ifitm6	-0.311972	6.07981e-05	0.00514167					Rps14	-0.290856	0.00028511	0.0233213
Gpr183	-0.0915984	6.78226e-05	0.00566403					Oas2	-0.12505	0.000327064	0.0264186
BC002163	0.102121	8.21078e-05	0.00677238					Myo5b;Myo5a	-0.163275	0.000379134	0.0302465
S100a8	-0.172529	8.41764e-05	0.00685832					Hspa1b	0.26739	0.000389024	0.0305148
Cox8a	0.210856	8.91619e-05	0.00717699					AK217941	0.262582	0.000391942	0.0305148
Klhl6	0.131308	9.21861e-05	0.00733209					Itgb7	0.220578	0.000407595	0.0312759
Clec2i	-0.13159	9.69269e-05	0.00761846					Cbfa2t3	-0.324436	0.000414706	0.0312759
Lgmn	-0.132872	0.000118915	0.00923807					Rpl30	0.226576	0.000416833	0.0312759
Hcls1	0.210142	0.000128443	0.00986351					Fam105a	-0.270084	0.00042589	0.0312759
Ifi30	0.324745	0.000131332	0.00997082					Psmb9	0.274	0.000431841	0.0312759
Tmsb4x	0.205462	0.000149667	0.0112351					Cmpk1	0.211949	0.000433764	0.0312759
Uqcr10	0.164835	0.000154095	0.011439					Cd300e	0.196642	0.00043703	0.0312759
Metrnl	-0.193136	0.000157324	0.0115504					Gngt2	0.347094	0.000443991	0.0312759
Irf4	-0.0651825	0.000167128	0.0121368					S100a4	-0.393401	0.00044973	0.0312759
Socs1	0.0630637	0.00018857	0.0135466					Rab5b	-0.0896354	0.000450117	0.0312759
Fcgr4	0.248863	0.000197094	0.0138811					1110003E01Rik	-0.163793	0.000585512	0.0402508
Ctsc	0.313133	0.00019911	0.0138811					Gbp3	0.153002	0.000598544	0.0407136
Cox7b	0.220478	0.000199459	0.0138811					Prkcd	0.257189	0.000626167	0.0421488
Il18bp	0.0530626	0.000210458	0.0144956					Bcl2a1a	0.173782	0.000640724	0.0426841
Tgtp2;Gm12185	0.059186	0.000214301	0.0146096					Tapbpl	0.113056	0.000668388	0.0437416
Atp5e	0.233796	0.000221584	0.0149535					Ramp1	-0.145812	0.000670135	0.0437416
Psmb10	0.217604	0.000224894	0.0150252					Mgst1	0.172143	0.000734003	0.0471608
AK020764;Mir142	-0.147006	0.000245625	0.0162353					Nlrc5	0.134393	0.000737115	0.0471608
Cfl1	0.273441	0.000247867	0.0162353					Rpl13a;Rpl13a-ps1;Snord35a;Snord34;Snord33	0.287507	0.000764839	0.0484548
Nat8l	-0.0731918	0.000267665	0.0173095					Plbd1	-0.326687	0.000820674	0.0514874
Rpl39;Snora69	0.157081	0.000269449	0.0173095					Fpr2;Fpr3	0.101483	0.000829989	0.051571
Neat1;AK148054	-0.12764	0.000275353	0.0175023					Emr4	0.20796	0.000842368	0.0518418
Gm12250	0.158914	0.000277689	0.0175023					Fam26f	0.195417	0.000866138	0.0528017
Ndufa3	0.177262	0.000302139	0.0188653					Sfrs11;Srsf11	-0.232234	0.000876	0.0529038
Stx8	0.099239	0.000308214	0.0190664					Serinc3	0.258665	0.000896505	0.0536409
Blvrb	0.0960194	0.000339238	0.0207931					S1pr5	0.11826	0.000941387	0.0553329
Tbc1d2b;mKIAA1055	0.114121	0.000351254	0.0213339					Ahnak	-0.179337	0.000941909	0.0553329
Hspa1a	0.159572	0.000370006	0.0220776					Rpl13;Snord68	-0.269625	0.00104044	0.0605703
Tssc1	0.0669937	0.000370108	0.0220776					Myo1g	0.241966	0.0010798	0.0617605
Mtx1	0.066992	0.000384227	0.0222153					Rgl2	-0.125502	0.00108	0.0617605
Cxcl16	0.0622029	0.000384714	0.0222153					Lair1	0.205148	0.00114882	0.0651198
D4Wsu53e	-0.202046	0.000385214	0.0222153					Nod1	0.204187	0.00122863	0.0690383
Isg15	0.149943	0.000385717	0.0222153					Snx10	0.194593	0.0012553	0.0699289
Psme1	0.131085	0.000405632	0.0231626					Aldoa	0.179579	0.00128862	0.0711717
Hspa1b	0.136238	0.000422352	0.023913					Cotl1	0.203288	0.00134293	0.0735425
Atp5f1	0.226037	0.000437466	0.0245606					H2-Eb1	-0.362244	0.00142745	0.0775144
Aph1b;Aph1c	-0.078215	0.000468628	0.0260908					Trem3	0.130787	0.0014555	0.0783787
Mir684-1;Sumo2	-0.0566069	0.000483706	0.0267078					Fam102b	-0.0977685	0.0017404	0.0929463
Ids	-0.113709	0.00051486	0.0281949					Terf2;mTRF2	-0.0719889	0.00175853	0.0931445
Sdhb	0.162261	0.000529854	0.0287157					Ttc7	0.175127	0.00177527	0.0932665
Nxn	0.0588851	0.00053458	0.0287157					Rpl11	-0.100828	0.00180841	0.0936547
Lima1	-0.122745	0.000537264	0.0287157					March2;AK036614	-0.110196	0.00181709	0.0936547
Tmem199	0.0516293	0.000559695	0.0296771					Cyth3	0.134799	0.00183977	0.0936547
Integrin Alpha-4;Itga4	-0.187368	0.000605817	0.0318698					Ctss	0.313709	0.00186356	0.0936547
Snd1	0.119708	0.000612648	0.0319282					Tspan5	-0.0568247	0.00186816	0.0936547
Zcchc9	0.067652	0.000616485	0.0319282					Mmp12	-0.0667414	0.00186962	0.0936547
Atp5j	0.149199	0.000624073	0.0320726					Nfe2l2	0.223365	0.00192387	0.0944179
Rpl23;Snora21	0.230775	0.000669778	0.0341587					Cd83	-0.185156	0.0019349	0.0944179
Pomp	0.228928	0.000681296	0.0344829					Tgfbi	0.29274	0.00193576	0.0944179
Upp1	0.0734048	0.00070554	0.0354414					Grina	0.137755	0.0019433	0.0944179
Tmem9b	-0.112901	0.000780427	0.0389107					Macf1	-0.233705	0.00199615	0.0962623
Gm2a	-0.263537	0.000786574	0.0389267					Cd300ld	0.220281	0.00202842	0.0970939
Myadm	-0.22264	0.000819547	0.0402603					Cd36	0.0873953	0.00210716	0.0994664
Prdx5	0.26454	0.000853233	0.0416091					Zfp871	-0.134477	0.00210877	0.0994664
Fam46a	-0.172999	0.00086524	0.0418889
Pla2g7	0.208317	0.000883268	0.0424248
Tgfb1	-0.1579	0.000889009	0.0424248
Lsg1	-0.0797738	0.000910689	0.0431512
Cd177	-0.0972702	0.00102235	0.048101
Hsp90ab1	0.227566	0.00106046	0.049545
AK156292	-0.216418	0.00110653	0.0513385
Ceacam1	-0.186253	0.00116426	0.0536442
Fnta	0.0938896	0.00118404	0.054182
Cstb	0.166407	0.00120423	0.0547311
Romo1	0.0808416	0.00122246	0.055072
Rnf19b	0.131199	0.00122822	0.055072
Smpdl3b	0.145842	0.00125888	0.0560707
Rps24	0.223529	0.00130827	0.0578844
2310005E10Rik;Akr1b10	0.0575052	0.00131968	0.058005
Cyfip2	0.179373	0.00136685	0.0596858
Cotl1	0.187446	0.00138043	0.0598874
Lcn2	-0.0824409	0.00140936	0.060646
Ltf	-0.0635541	0.00141607	0.060646
Nfic	-0.0965927	0.00149431	0.0635892
Rps21;Mir3091	0.177163	0.00153733	0.0644027
Cdkn1a	0.0972893	0.00155097	0.0644027
Pltp	-0.0698016	0.00156092	0.0644027
Ssh2;mSSH-2L	-0.10004	0.00156142	0.0644027
Nfatc3	-0.125569	0.00156163	0.0644027
Eef2;Snord37	0.216283	0.00157148	0.0644113
Sema4a	0.130667	0.00173481	0.0706723
Ndufc1	0.0777793	0.00175915	0.0711133
Ifitm2	-0.18281	0.00177564	0.0711133
Rab11b	-0.143896	0.00178666	0.0711133
Csnk1e	-0.0979788	0.00178878	0.0711133
Chchd2	0.185199	0.00180302	0.0711133
Plxnd1	-0.100511	0.00181495	0.0711133
Kctd12b	-0.0565007	0.00182679	0.0711133
Pnp	0.184866	0.00183079	0.0711133
Cox7a2	0.153197	0.0018662	0.0720697
Lbr	-0.0510781	0.00189702	0.0724483
Gbp8	0.074014	0.00189769	0.0724483
Nod1	0.151847	0.00191158	0.072564
Pycard	0.173778	0.00192308	0.0725883
Itgb7	0.175216	0.00195972	0.0735556
Tomm7	0.142433	0.00198124	0.0739434
1810033B17Rik	0.149032	0.00199219	0.0739434
Abca9	-0.0646419	0.00202176	0.0739978
Pan3	-0.0604172	0.00202297	0.0739978
Kiaa0028;Lars2	0.219081	0.00202688	0.0739978
Atp5a1	0.194227	0.0020716	0.0752195
Rel	-0.0841841	0.0020958	0.0756868
5033414K04Rik;Pid1	-0.0803121	0.00219334	0.0787832
1110038D17Rik	-0.0898987	0.00226367	0.0807685
Rpl22	0.225681	0.00227279	0.0807685
Tgm2	0.124231	0.00231018	0.081663
Cox6c	0.146409	0.00232774	0.0816818
Luc7l2	-0.105518	0.00233516	0.0816818
Lmo4	0.139087	0.00237514	0.0826136
Txnip	-0.183639	0.00239108	0.0826136
Usmg5	0.0766422	0.0023989	0.0826136
1810037I17Rik	0.0923511	0.0024516	0.0839957
Mef2c;AK043267	-0.106986	0.00257313	0.0877094
Ptpre	-0.16755	0.00264201	0.0896004
H2-DMa	0.177833	0.00268476	0.0905904
Cox7c	0.0620886	0.00278546	0.0935157
Mier1	-0.142047	0.00282753	0.0939736
Atxn7l3b	-0.123369	0.0028345	0.0939736
Edc3	0.0485413	0.00284129	0.0939736
Vps52	0.0491157	0.00289347	0.095228
Nckap1l	0.159935	0.00300529	0.0979636
Cct3	0.0782151	0.00300592	0.0979636
Sos1	0.0309674	0.00304531	0.0987655
Dnase1l1	-0.0950515	0.00306936	0.0990646

## Sheet: supplementary file 1b
Table S2: Training induced DEGs from the kinetics experiment. Total splenocyte log2-ratio expression from both naïve (PBS) and trained (BCG) vaccinated mice at days 3, 14, 30, 45, and 40 days after vaccination. Replicates are marked at the end of the sample name.
Gene names	PBS_3d_2	PBS_3d_3	PBS_30d_1	PBS_30d_2	PBS_60d_1	PBS_60d_2	PBS_60d_3	BCG_3d_1	BCG_3d_2	BCG_3d_3	BCG_3d_4	BCG_14d_1	BCG_14d_2	BCG_14d_3	BCG_14d_4	BCG_30d_1	BCG_30d_2	BCG_30d_4	BCG_45d_1	BCG_45d_2	BCG_45d_3	BCG_45d_4	BCG_60d_1	BCG_60d_2	BCG_60d_3
'Mtus1'	3.7468	3.90689	3	3.40207	4.12924	3.33622	3.5708	4.47668	4.20979	4.10414	4.34966	4.12135	4.26326	4.04955	4.28615	4.30116	3.94583	3.87928	3.6701	4.48497	3.86293	4.24997	3.58496	4.20866	3.6014
'Rpl36'	4.54622	4.24793	3.67218	3	4.59092	4.82266	4.58345	4.08308	4.63631	5.22669	5.02263	4.49725	4.60904	4.90899	4.8733	4.7097	4.31569	4.55113	4.70788	4.24908	4.81249	3.70243	4.4285	4.97348	4.6865
'Smagp'	3	4	4.24894	3.69645	4.68645	3.99007	4.43004	4.53298	4.88964	4.87508	4.85153	4.70254	4.60904	3.85645	4.28615	4.34763	4.10532	3.81683	4.5099	4.16102	4.45554	4.59559	4.61274	4.90189	4.54071
'1200002N14Rik;Dram1'	3	3.16993	3.26529	3	3	3.07811	3.14727	3.54006	3	3.85778	3.41874	4.25783	4.05334	4.75124	4.81868	3.23099	3.32287	3.37178	4.15026	4.16102	3.5953	3.49839	3.29278	3.54176	3.07468
'1500010J02Rik;Ctc1'	4.54622	4	3.67218	4.49412	3.20941	3.74508	4.61938	4.35702	3.93751	4.87508	4.65737	4.83935	5.15674	4.75124	4.76192	4.84542	5.02338	4.69697	4.88195	4.33207	4.45554	4.04016	4.27302	4.14807	4.6865
'1810046J19Rik'	3.45149	4	3.14272	3.55675	3.64957	4.38222	4.30324	3.92375	3.77931	4.80715	4.34966	4.65389	4.05334	4.44264	4.76192	4.67367	4.1789	3.6114	4.88195	3.96692	4.28371	4.04016	4.21723	4.20866	4.6865
'Anxa2'	6.49915	5.97728	6.44544	5.50039	6.06604	6.20548	6.23584	6.5953	6.96719	6.87139	6.2037	6.91897	6.8289	6.7388	6.88988	6.10346	6.5648	6.4227	6.59262	6.84198	6.9563	6.65216	6.51096	6.58577	6.73047
'Atp5g1'	3	3	3.5807	3.69645	3.64957	3.65321	3.95516	4.08308	4.32881	3.98621	4.06634	4.3825	4.60904	4.75124	4.70283	4.47868	4.02778	4.51225	4.5099	4.41055	4.18945	3.12529	3.58496	3.71884	3.86913
'Bst1'	3.45149	3	3.83937	3.03183	3	3	3.83806	3.92375	4.63631	3.71679	4.26126	4.60354	4.60904	5.29936	4.64121	4.0987	4.10532	3.87928	4.15026	4.41055	3.86293	4.59559	3.67054	3	3.2724
'C3'	5.25827	4.70044	4.94303	3.40207	4.94012	4.69025	4.72209	5.00049	5.60701	5.42101	5.17557	6.28244	6.15404	6.51164	6.47889	5.85269	5.17494	5.85132	5.81496	5.86847	6.05063	5.27689	5.60486	4.93813	5.42878
'C5ar1'	3.07975	3.58496	3.14272	3	3.82777	3.4498	3.83806	3.83697	3.93751	4.10414	4.78966	4.65389	4.26326	4.44264	4.2033	3.72912	3.32287	3.37178	3.22931	4.48497	4.18945	4.24997	3.39689	3.63301	4.09487
'Ccl4;ScyA4'	3.07975	3.16993	3.67218	3.69645	3.44621	4.43835	3.49546	4.15659	3.60159	3.85778	3.95802	3.61163	4.50273	5.09562	5.70529	4.15204	3.7665	3.81683	4.15026	4.62321	4.28371	4.24997	3.90046	4.01868	4.09487
'Ccr5'	3	3.32193	3.48303	3.22879	3	3.65321	3.41597	3.64597	4.08007	3	3.24524	4.25783	4.05334	4.5741	4.28615	3.12826	3.4472	3.28216	4.5099	4.06723	4.18945	4.04016	3.39689	3.79984	3.74147
'Cfb;C2'	4.20119	3	3.5807	3.69645	3.20941	3.07811	3.5708	3.83697	4.63631	5.06157	4.58637	4.88222	5.47056	6.05199	5.28943	4.63672	4.31569	4.62589	3.84851	3.47684	4.68011	4.99563	3.82782	3.54176	4.75422
'Clec4d;Mcl'	4.54622	3	3.26529	3	4.59092	3	3.0453	4.08308	4.54091	4.31449	3.8409	4.44102	4.70805	4.21984	4.28615	3.65715	3.18679	3.93914	4.00726	4.16102	4.45554	3.70243	3.49399	3.22723	3.6014
'Clec4e'	4.20119	3.16993	3.37827	3.22879	4.4886	3.65321	3.24251	4.47668	4.20979	4.21315	3	4.44102	4.8007	5.60628	5.02574	3.98571	4.3795	4.10513	3.6701	4.86536	3.73531	4.48932	3.90046	3.94936	4.09487
'Cxcl10'	4.20119	3.32193	4.05864	3.03183	3.20941	3.74508	3.6424	3.74463	3.93751	5.00205	3	4.55138	4.96986	6.02925	6.14333	4.04331	3.94583	3.99662	3.6701	4.33207	3.98018	4.31363	4.47681	4.20866	4.88081
'Cxcl9'	4.20119	4.39232	4.61445	4.77193	3.82777	5.15962	4.72209	5.03988	4.32881	5.27778	4.96782	6.50447	6.67831	7.66724	7.24087	5.76981	5.8058	6.01326	6.01512	6.07534	6.25059	6.30591	5.84465	5.65615	6.10983
'Fgl2'	6.33122	6.20945	6.32376	5.80825	6.13541	6.08759	5.86881	6.6215	6.49367	6.42689	6.46347	7.04694	7.16146	7.64499	7.58154	6.69495	6.34266	6.64568	6.22358	6.93784	6.75712	6.89001	6.66486	6.8174	6.87437
'Fpr2;Fpr3'	4.20119	3.80735	4.56757	3.94081	3.44621	4.32383	3.95516	4.35702	4.54091	4.66086	4.58637	5.04198	5.38336	6.07437	5.02574	4.84542	4.49925	4.55113	4.88195	4.68767	5.0984	5.3394	4.52356	4.20866	4.88081
\\\	7.58749	7.75489	7.67686	7.39658	7.63658	7.64051	7.55785	7.8205	7.89545	7.50679	7.60646	8.47161	8.65535	8.98638	8.88406	8.17076	8.03446	8.21194	8.1843	7.99697	8.32764	8.2109	8.05383	8.44193	8.35623
'Gbp2'	5.73289	6.14975	4.94303	5.20524	5.65816	5.77532	5.41675	5.93663	5.65336	6.42689	5.88666	7.32844	7.29486	8.0526	8.0765	6.41847	6.49448	6.64568	6.84478	6.93784	6.82138	6.85834	6.58996	6.88394	7.28251
'Gbp3'	6.03579	5.72792	5.67593	5.25129	5.91643	6.01563	5.85381	5.82831	6.1501	6.20729	5.82632	6.3754	6.69047	7.00658	7.26149	6.19526	5.93884	6.08125	6.22358	6.12273	6.25059	6.41152	6.14295	6.35059	6.69645
'Gbp5;Gbp1'	4.38399	4.64386	4.46898	4.24383	4.25923	4.82266	4.96486	4.8312	5.17028	5.00205	4.72503	5.98101	6.46839	6.5758	6.31099	5.23967	5.40701	5.06259	5.10906	5.33657	5.81842	5.76081	5.14839	5.54305	5.85612
'Gbp8'	5.05761	4.58496	5.08295	4.41541	4.77606	4.43835	5.26623	5.28906	5.10507	4.80715	5.26921	5.62495	5.88451	5.88478	5.51229	4.74484	5.46699	5.11544	5.53114	5.16609	5.38023	5.45684	5.3434	5.34135	5.58572
'Gm12250'	6.6134	6.49185	5.69786	5.33919	5.79307	5.97825	5.85381	5.99792	6.27394	6.12598	6.22723	6.58453	7.27884	7.39233	7.58154	5.86872	6.6054	5.66889	6.61746	6.61222	6.77346	6.56328	6.55663	6.76793	7.08627
'Gm4841'	3	3	3	3	3	3	3	3	3	3	3	3.2681	4.32696	4.6356	4.1154	4.47868	3.32287	4.30036	3.6701	3.15082	3	3	3.49399	3.63301	3.44626
'Gm4951'	3.99181	3	3	3	3	3.07811	3.14727	3.54006	3.60159	3.18568	3.04799	4.49725	5.29056	5.33687	4.97669	3.92571	3.18679	3.6114	3.46647	4.06723	4.37218	3.26066	4.47681	4.61902	4.37851
'Gzmb'	4.69204	3.16993	3.83937	4.24383	3	3.99007	3.5708	3.30162	3.39888	3	3.04799	4.44102	5.08486	5.22128	5.902	3.72912	4.24891	4.43119	4.88195	4.80852	4.45554	4.99563	4.03562	3.33987	4.37851
'Hdc'	3.45149	4.32193	3.83937	3	3.98637	4.13296	3.71061	4.41809	4.43876	4.49805	4.43296	5.04198	5.00922	5.63668	5.1191	4.67367	4.55559	4.69697	4.88195	5.02354	5.04557	5.07125	4.21723	4.57367	4.54071
'Hp'	5.51501	4.75489	4.41703	4.49412	4.77606	4.69025	4.75477	5.25599	5.9418	5.27778	5.47973	5.46495	5.15674	6.16057	6.31099	5.05597	5.21047	5.14115	5.47789	5.97561	5.50287	6.03082	5.02384	5.1068	5.69314
'IIGP;Iigp1'	5.73289	5.67243	5.11591	5.25129	4.77606	5.51319	5.04631	5.66156	5.17028	5.7453	5.12637	7.44024	8.17383	8.52839	8.17218	6.58288	6.63184	6.7745	6.84478	6.9641	7.24108	6.86897	7.14771	7.64553	7.61857
'Ifi44'	3.07975	3	3	3	3.98637	3.74508	3	3.83697	3.93751	3	3.5736	4.32151	5.41302	5.33687	4.64121	4.04331	3.85895	4.15647	4.00726	4.41055	3.73531	3.96284	3.75132	3.94936	4.54071
'Ifitm1'	3.07975	3.45943	3.75819	3	3.82777	4.06328	3.8978	4.53298	4.63631	4.31449	3.24524	5.00367	4.84489	5.09562	5.02574	3.5814	3.32287	4.10513	4.5099	4.62321	3.86293	4.48932	4.21723	4.52685	5.54805
'Ifitm3'	6.53825	6.58496	5.93794	6.27743	6.03007	5.73107	5.66041	6.5953	7.02121	7.1015	6.57769	7.39656	7.50221	7.75299	7.60594	6.57314	6.22599	6.44352	6.3175	7.07668	6.22706	6.86897	6.1127	6.11766	6.7962
'Igtp;Irgm2'	7.27672	7.36632	7.04212	6.82607	6.43958	6.48404	6.68898	7.13037	6.89186	7.18417	6.87442	7.98851	8.1432	8.59955	8.32695	7.51554	7.4792	7.57384	7.71736	7.59646	7.82286	7.58818	7.49132	7.87782	8.04084
'Irgm1'	7.13087	7.32193	6.74837	6.82607	6.46674	6.92809	6.87139	7.03612	6.93002	7.27498	7.19388	7.9233	8.06597	8.06941	8.36079	7.38238	7.56404	7.38766	7.54686	7.69382	7.72546	7.3202	7.38773	7.56091	7.62763
'Klra2'	4.20119	3.80735	4.78808	3.40207	4.12924	3.4498	3.41597	4.58716	4.32881	4.93996	3.8409	4.92385	5.15674	5.22128	5.28943	4.25315	4.02778	3.87928	4.39969	4.33207	3.98018	4.91583	4.52356	4.47845	4.88081
'Ly6a'	8.08669	7.81378	7.61481	7.36551	7.78426	7.89232	8.0477	8.02081	7.20359	8.29533	7.83801	8.63717	8.64289	8.37005	8.90387	8.1772	8.13495	7.46096	8.56869	8.4374	8.62186	8.63203	8.52225	8.57158	8.42538
'Ly6c2'	6.68483	6.37504	6.58143	6.34268	6.41189	6.28416	6.7949	6.49966	6.59213	7.22379	6.6491	7.42583	7.69558	7.83392	7.87712	6.81557	7.11686	6.7745	7.41142	7.53648	7.29865	7.21576	7.0231	6.9564	7.19992
'Marco'	4.54622	3	4.94303	3	3.44621	3.55508	3.0453	4.15659	4.63631	5.22669	3.8409	4.96431	4.55686	4.44264	4.3645	3.98571	3.7665	3.75155	3	3.32302	4.37218	3.70243	3.29278	3.44434	4.61545
'Mocs2'	4.20119	4.45943	3.5807	3.8238	3.98637	3.99007	4.61938	4.15659	4.08007	4.87508	4.85153	4.79517	4.8007	4.50987	4.92592	4.55986	4.854	4.25397	4.79754	4.41055	4.68011	4.54343	4.09873	4.47845	4.6865
'Ms4a6d'	3.45149	3.32193	3.37827	3	3.20941	3.55508	3.71061	4.22654	4.32881	3.85778	3.04799	4.70254	4.26326	5.22128	4.43881	3.41681	3.56167	3.08428	3.84851	4.55575	3.86293	4.54343	4.47681	3.54176	4.61545
'Msr1'	3.45149	3	4.05864	3	3	3	3	3.30162	3.93751	3.18568	3.5736	4.32151	3.89423	4.69458	3.9217	3.5814	3.7665	3.28216	3.6701	4.68767	3.73531	3.88115	3.67054	3.79984	3.86913
'Mthfd1'	4.69204	4.24793	4.41703	4.24383	3.44621	4.26297	4.21206	5.66156	4.63631	4.87508	4.26126	4.65389	4.88776	5.29936	4.97669	5.28813	4.3795	4.82941	4.88195	4.55575	5.14936	5.07125	4.47681	4.47845	3.98641
'Ndufa12'	4.54622	4.58496	4.51911	4.41541	4.59092	4.32383	5.14821	5.61015	4.81004	5.59225	5.17557	5.52028	4.96986	5.72421	5.3676	5.56873	5.40701	5.03542	4.96169	5.02354	5.14936	5.42837	4.85133	4.47845	5.10486
'Oasl2'	5.34902	4.75489	5.29925	5.64537	5.34336	4.94394	4.43004	4.91833	5.50959	5.63206	4.85153	6.25008	6.70253	7.13988	6.4964	6.23288	5.87385	6.47419	5.47789	6.12273	5.14936	5.53905	5.29032	5.2578	5.79312
'Olfr56;Ifi47'	7.34446	7.77479	6.83998	6.8412	6.5954	7.00443	7.25507	7.13947	6.98542	7.62001	7.49458	7.89217	7.6465	8.24245	8.47997	7.41001	7.38905	7.22884	7.97925	7.73253	7.95048	7.69961	7.52617	7.53748	7.85284
'Ppa1'	3.7468	4.58496	4.41703	4.49412	4.77606	4.5947	5.01967	5.61015	4.72579	5.11873	4.85153	5.00367	5.41302	5.77974	5.64378	5.73527	5.279	5.00773	5.68002	5.2958	5.24619	4.78718	5.056	5.1068	5.29875
'Prdx5'	6.14113	5.83289	6.30959	5.77711	5.95531	5.83925	5.79218	6.28696	6.41514	6.47146	6.22723	6.99905	6.78422	7.06362	7.01661	6.66774	6.06064	6.3693	6.51545	6.6612	6.40536	6.44033	6.35167	6.1643	6.7962
'Saa3'	3.07975	3.32193	3	3	3	3.33622	3	5.22215	5.8651	4.40919	4.72503	5.64997	4.70805	6.02925	5.67486	4.74484	5.02338	3.87928	4.5099	4.06723	4.18945	5.71439	3.18057	3	3.98641
'Serpina3f;Serpina3g'	5.34902	6.20945	5.86227	5.83873	6.26486	6.18922	6.11519	5.89427	6.56814	6.67575	6.02732	7.50339	7.89788	7.83392	8.04115	6.80728	6.94823	6.74964	7.18095	7.33994	7.1057	7.01017	7.14771	7.38174	7.56301
'Slamf8'	3.45149	3.58496	3.98919	3	3.82777	3.4498	3.24251	3.92375	3.60159	3.98621	3.24524	5.00367	4.55686	4.90899	4.92592	3.98571	3.94583	3.18661	4.5099	4.16102	3.86293	4.24997	4.37851	4.20866	4.29002
'Slc31a1'	4.20119	4.45943	3.67218	4.14972	4.12924	4.32383	4.389	4.87542	4.43876	4.93996	4.06634	4.79517	4.88776	5.47786	5.32905	4.25315	4.66207	4.55113	5.10906	4.48497	4.81249	4.59559	4.65535	4.42838	4.6865
'Slfn4'	4.69204	4.58496	5.17964	4.77193	5.61024	5.61411	5.04631	5.28906	6.01463	5.46577	5.35713	6.18309	6.35074	6.26155	6.29107	5.4026	4.66207	5.21566	5.47789	5.69119	5.65169	6.14021	4.85133	5.34135	5.29875
'Smpdl3b'	3.7468	3.70044	3.48303	3	3.44621	3	3.0453	3.30162	3.60159	3.98621	3.24524	5.15117	4.05334	4.8583	4.76192	4.15204	3.56167	3.28216	3.22931	4.33207	3.5953	3.70243	4.1592	3.33987	4.54071
'Socs1'	3.7468	5.04439	4.61445	4.04905	4.59092	4.64327	4.65443	4.22654	4.20979	4.49805	4.72503	5.54717	4.92939	5.83321	6.33064	4.4363	4.98286	4.47229	5.17745	5.55961	5.38023	4.99563	5.08746	5.19928	5.65821
'Socs3'	5.16143	5.45943	5.14813	5.1085	5.28351	4.26297	5.28872	5.63608	5.97867	5.42101	5.6975	5.79162	5.25825	5.85923	6.62928	5.18953	5.21047	5.30937	5.93835	6.07534	5.33692	5.91244	5.78833	6.10178	5.69314
'Stat1'	8.94547	9.03892	8.70075	8.61554	8.93482	8.84585	8.67633	8.79733	8.85324	9.08645	8.86891	9.63066	9.72475	9.6656	9.97596	9.02549	8.891	8.87981	9.52802	9.40927	9.52432	9.24974	9.37648	9.66059	9.69072
'Tbkbp1'	3	3	3.67218	3	3.44621	3	3.41597	3.54006	4.54091	3.98621	3.41874	3.80226	3.27323	4.21984	4.64121	3.92571	3.32287	3.93914	3.84851	3.85911	3.5953	3.38442	3.58496	3.54176	4.19574
'Tgtp2;Gm12185'	4.20119	4.85798	3.91622	3.03183	4.4886	4.19943	4.11472	3.64597	4.43876	4.58175	4.65737	5.25267	5.38336	5.44388	5.40516	4.84542	4.55559	4.66187	4.88195	5.2958	4.81249	4.3746	4.4285	5.28619	4.6865
'Tmem186'	3.07975	4.85798	3	3.03183	3.44621	3.65321	3.77575	3.64597	4.43876	3.71679	3.71343	4.55138	4.12676	4.44264	3.9217	3.86311	4.31569	4.15647	3.46647	3.32302	4.37218	4.18336	3.90046	3.71884	3.98641
'Tmem38b'	4.54622	3.58496	3.67218	3	3.64957	3.33622	3	4.15659	4.08007	4.31449	3.8409	4.32151	4.32696	3.74924	4.50948	4.0987	3.94583	3.37178	3	4.48497	3.86293	3.70243	4.32673	3.71884	3.86913
'Ubd'	3.99181	3.70044	3	3	3	3	3	3.30162	4.08007	3.38524	3.24524	4.44102	4.65939	5.60628	4.57685	3.98571	4.31569	3.28216	3.46647	4.16102	3.86293	3	4.03562	3.87654	4.99718
'Wars'	5.79877	5.39232	5.21049	5.25129	4.4886	5.68541	5.71125	5.58374	5.34988	5.42101	5.51838	6.3754	6.25574	6.72471	7.11054	5.66361	5.57996	5.6511	5.58249	6.02633	6.10327	5.69061	5.86294	5.83975	6.16063
'Xdh'	3.99181	4.45943	4.74659	3.8238	4.68645	4.64327	3.95516	4.53298	5.10507	4.87508	4.65737	5.25267	5.15674	4.90899	5.3676	4.67367	4.55559	4.47229	4.88195	5.72229	4.87438	4.87421	4.69673	4.97348	5.25267
'Zbp1'	5.51501	5.80735	5.56096	5.38121	5.61024	5.40469	5.4962	6.03738	5.74182	6.35734	5.79518	6.8772	6.67831	7.02967	7.24087	5.69989	6.02117	5.78762	6.088	6.25622	6.31896	6.55013	6.0015	6.06947	6.53255
'Zfp771'	3.45149	4.52356	4.30717	3	3.64957	4.06328	4.389	3.83697	4.08007	4.40919	3.95802	4.04795	4.70805	4.80576	4.76192	4.04331	4.24891	4.25397	4.00726	4.41055	4.18945	4.18336	4.4285	4.3227	3.98641
'2210023G05Rik;Ces2g'	4.20119	3	6.02727	6.57767	5.34336	5.05581	6.01085	6.1132	4.63631	5.22669	4.85153	5.52028	6.39599	7.17137	5.9536	7.23566	6.8615	7.62029	5.68002	5.37622	5.46314	4.74161	5.6893	5.07461	5.97442
'Abcg4'	3	3	4.41703	5.53802	3.20941	3.07811	4.34676	4.35702	3	3.56052	4.16709	4.70254	5.00922	6.16057	3.6979	5.97614	6.06064	6.56248	4.96169	4.24908	3.26643	3.38442	4.21723	3.79984	3.74147
'Alad'	4.94574	3.90689	6.02727	6.9707	5.70455	5.58953	5.67756	6.03738	5.03677	5.7453	5.66341	5.96115	6.64121	7.24227	6.00342	7.50532	7.2423	7.68291	6.3175	5.94956	5.29227	5.24459	5.70965	5.76102	5.69314
'Aldh1a1'	3.07975	3	4.94303	5.53802	4.12924	3.83145	3.95516	4.58716	3.60159	3.56052	4.16709	4.60354	5.65559	6.31891	4.1154	6.07612	6.07998	6.59075	4.5099	5.12012	3.5953	4.04016	3.82782	3.94936	4.09487
'Ank1'	4.54622	3.70044	7.19646	8.52472	6.13541	6.28416	6.14014	6.64724	5.9418	6.20729	6.17979	6.51813	7.48835	8.32409	6.33064	8.50135	8.40021	8.87407	7.2776	7.18111	6.22706	5.56544	5.95109	5.67774	6.58928
'Anxa3'	3.7468	3	3.14272	3.69645	4.12924	3.33622	3.71061	4.08308	4.08007	4.21315	4.16709	3.88889	3.39711	4.69458	4.43881	4.34763	3.94583	4.20604	3.22931	4.06723	4.28371	3.96284	3.90046	3.94936	3.74147
'Apol11b'	4.20119	3	6.97185	7.75724	5.83537	5.77532	4.90789	5.07822	3.60159	4.31449	4.34966	8.49941	9.34483	9.81761	7.25122	9.51089	9.34511	10.1643	7.78469	8.01593	6.65501	6.29017	6.65439	6.08571	6.84361
'Aqp1'	5.16143	3.90689	7.20414	8.38198	6.43958	6.51046	6.29257	6.86026	5.7841	6.33339	6.52171	6.59745	7.65893	8.34725	6.79405	8.457	8.51477	8.83718	7.09515	6.75442	5.5792	6.19195	6.27177	5.98539	6.67913
'Asf1b'	4.54622	3.80735	5.21049	5.86858	3.64957	4.86423	4.389	5.07822	4.88964	5.06157	4.65737	5.46495	5.6051	6.28093	4.50948	6.24521	6.37433	6.60006	5.36511	5.72229	4.53434	4.87421	4.03562	4.14807	5.15583
'Asns'	3.7468	3	4.30717	3.8238	3.64957	3.33622	4.58345	4.47668	3.39888	4.40919	3	3.39192	5.08486	4.5741	3.6979	5.58821	4.80836	5.83566	4.39969	4.48497	3.98018	4.4331	4.27302	3.87654	4.8189
'Aurka'	3.7468	3	4.41703	5.5747	4.37847	4.13296	4.30324	4.35702	3.39888	3.85778	4.16709	4.12135	5.29056	6.33754	4.76192	5.93108	5.98059	6.48427	4.88195	4.97272	3.73531	4.18336	4.32673	4.14807	4.46189
'Birc5'	4.20119	3	6.26621	6.9707	5.56067	5.31759	5.6945	5.95735	5.55912	5.7453	5.44001	5.79162	6.56401	7.30985	5.64378	7.53575	7.27623	7.91303	5.85727	5.94956	5.29227	5.3394	5.46815	5.28619	5.88661
'Bola3'	3.45149	4.39232	5.53682	6.13733	4.68645	5.15962	5.07247	5.61015	5.17028	4.58175	5.35713	5.31657	5.88451	6.09641	5.44176	6.74789	6.34266	6.65464	5.68002	5.55961	5.42228	4.99563	5.46815	4.97348	5.54805
'Bub1b'	3	3.32193	4.56757	5.0048	4.37847	4.69025	4.46995	5.03988	4.81004	4.87508	3.95802	4.44102	5.6051	5.93456	4.70283	5.82011	5.17494	6.09448	4.00726	5.12012	3.98018	4.74161	4.47681	4.08483	4.61545
'Butr1'	3	3	6.59318	7.74924	5.4561	5.37624	5.37532	5.63608	4.88964	5.55131	4.96782	5.46495	6.79552	7.70359	5.73508	7.58021	7.62455	8.0885	6.3175	5.94956	5.46314	4.91583	5.3434	5.22884	5.29875
'Cald1'	4.38399	3.70044	3.83937	3.69645	3.20941	3.55508	3	4.73848	5.23266	4.10414	4.34966	5.0793	4.84489	4.50987	3.57147	4.67367	4.44062	5.00773	4.00726	4.55575	3.26643	3.60401	3.39689	3.10505	3.44626
'Capn5'	3.99181	3.32193	4.74659	5.05758	3.82777	4.43835	4.34676	4.47668	4.08007	4.49805	4.72503	4.79517	5.32216	5.93456	5.24869	5.2641	5.10115	6.3693	4.70788	5.25385	4.74781	4.04016	4.73696	4.86472	4.8189
'Car1'	6.81788	5.64386	7.6602	7.71679	7.10795	6.83707	7.69887	7.98594	7.05613	7.62987	7.29753	7.17313	8.17816	8.71445	7.50578	8.79759	8.29244	8.98117	7.48073	7.0646	6.63727	7.01974	7.60979	7.05869	7.71519
'Car2'	8.53625	6.47573	10.405	11.2287	9.36846	9.23853	9.32887	9.75634	8.78722	9.16319	9.35879	9.75983	10.688	11.3013	9.26723	11.5205	11.3697	11.9813	10.1596	10.2236	9.18895	9.18525	9.28447	8.93202	9.46682
'Ccdc99'	3.99181	3.16993	3.91622	4.33217	3	3.07811	4.21206	3.92375	3.60159	3	3.24524	3.97061	4.75512	4.50987	4.3645	4.77915	4.44062	5.39736	4.70788	4.06723	3.73531	4.18336	3	3.63301	4.46189
'Ccnb1'	3.07975	3	4.65985	5.50039	4.59092	4.19943	4.11472	4.78559	3.39888	4.40919	4.78966	4.7496	5.19138	6.222	5.02574	6.22045	5.78238	6.27953	4.79754	5.07264	4.08861	4.3746	4.52356	3.94936	3.07468
'Ccne1'	3	3	5.21049	5.05758	4.12924	4.26297	4.99252	5.07822	3	3.98621	4.5117	4.1912	5.52589	6.37408	4.57685	6.16962	5.98059	6.79894	4.96169	4.62321	4.45554	4.3746	4.73696	4.70565	4.8189
'Cdc6;cdc6'	3.07975	3	4.61445	5.1085	3.82777	4.32383	4.43004	4.68978	3.60159	4.49805	3.95802	4.1912	5.47056	5.93456	4.0218	6.28156	6.02117	6.34738	4.70788	4.06723	3.98018	4.11354	3.96962	4.20866	4.37851
'Cdca3'	3.7468	4	6.39262	7.12705	5.34336	5.43259	5.60773	6.05671	5.03677	5.63206	5.6285	5.96115	6.81786	7.41003	6.00342	7.54076	7.6571	7.7679	6.05202	5.97561	5.72071	5.76081	5.44405	5.1068	5.97442
'Cdca8'	3.45149	3.32193	5.80279	6.68222	4.86042	4.9822	5.09816	5.52942	5.60701	5.22669	4.72503	4.79517	6.02556	6.7388	5.40516	7.07233	6.74519	6.95207	5.68002	5.33657	4.93373	5.24459	5.14839	4.90189	5.38673
'Cdk1'	4.20119	4.16993	5.4619	6.71544	4.77606	5.34721	5.07247	5.55683	4.63631	4.93996	4.91084	5.43647	6.48244	7.04107	5.47746	6.97947	6.94823	7.33292	5.89838	5.52475	5.29227	5.21155	5.08746	5.19928	5.25267
'Chi3l3'	5.34902	4.80735	5.11591	5.64537	5.50933	4.90464	5.31086	6.09461	5.97867	5.78115	6.05387	6.20013	6.99497	7.78047	7.30188	7.3542	7.21632	7.42477	7.33861	7.50105	7.45875	7.01017	6.45176	5.82047	5.97442
'Cited4'	3.07975	3.58496	4.46898	4.04905	4.25923	3	3.6424	4.29326	3.39888	4.31449	3.71343	3.61163	5.25825	4.95796	3	5.44596	4.60981	5.33187	4.39969	4.24908	3.98018	4.04016	4.37851	3.54176	3.6014
'Ckap2l'	4.20119	3.58496	5.40969	6.32126	4.59092	4.82266	4.68866	5.15198	5.17028	4.87508	4.91084	4.96431	6.2881	6.56002	5.24869	6.71282	6.76922	6.81501	5.81496	5.78255	4.99074	5.1431	4.52356	5.07461	4.75422
'Clspn'	3.99181	3.90689	5.11591	5.74529	4.77606	5.05581	4.5466	4.41809	4.20979	4.73586	5.02263	4.32151	6.15404	6.68163	4.64121	6.55345	6.00102	6.64568	5.36511	5.2958	4.99074	5.07125	4.52356	4.90189	4.94017
'Cpox'	6.53825	5.70044	8.41322	9.09424	7.34602	7.40732	7.58082	8.10678	7.00343	7.52805	7.41487	7.61561	9.04918	9.41685	7.53994	9.61903	9.29841	10.0853	8.27294	8.10712	7.37558	7.33562	7.50303	7.24379	7.6808
'Ctse'	5.86177	5.24793	8.16815	9.25542	7.30145	7.28256	7.52981	7.83736	6.74977	7.34852	7.41487	7.52384	8.52563	9.23262	7.3604	9.53368	9.53748	9.87636	8.20083	8.32032	7.18112	7.37345	7.33628	6.9564	7.42438
'D2Ertd750e;Gm14090'	3.99181	3.58496	4.18825	4.56874	3	4.06328	4.21206	4.41809	3.93751	4.58175	4.16709	4.04795	5.49849	5.57523	4.97669	5.71769	5.13852	5.5003	4.70788	5.02354	4.08861	4.24997	4.1592	4.37651	4.19574
'E2f1'	3.7468	3.32193	4.36315	3.94081	4.12924	3	3.77575	4.15659	3.77931	3.85778	3.71343	4.44102	4.96986	5.29936	3.6979	5.4026	4.7125	5.77124	3.84851	4.16102	3.98018	4.3746	4.09873	3.71884	3.74147
'E2f8'	3.99181	4.24793	5.9006	6.7639	5.01565	5.09125	5.33267	5.28906	5.29246	5.32712	4.91084	5.46495	6.35074	7.24227	5.61201	7.19176	7.12619	7.56437	5.97725	5.52475	4.45554	5.48477	5.11825	5.39448	5.88661
'Epb4.9'	4.38399	3	6.40601	7.68359	5.34336	5.12584	4.87854	5.47298	4.43876	5.17372	5.35713	5.69875	6.76135	7.36535	5.24869	7.78403	7.73845	8.36709	5.81496	6.35875	5.33692	4.69456	5.17791	4.86472	5.58572
'Ermap'	5.59135	4.32193	8.07485	9.31354	6.8015	7.40027	7.24361	7.59445	6.46796	7.31222	7.08221	7.36668	8.48781	9.17941	7.47961	9.41868	9.21341	9.72941	7.89035	7.84983	7.09274	7.12108	7.07895	7.05869	7.43473
'Fam132a'	4.20119	3.45943	5.43603	6.0092	4.94012	3.74508	6.14014	6.20269	5.29246	4.58175	5.35713	5.40742	6.67831	6.935	5.70529	6.77364	6.06064	7.05035	5.47789	5.33657	5.04557	4.99563	5.58295	5.07461	5.97442
'Fignl1'	3.7468	3.32193	4.36315	5.5747	4.25923	4.38222	4.06347	5.11557	3.77931	4.87508	5.22315	5.25267	5.75156	6.42721	4.3645	6.34019	6.00102	6.3909	5.30523	5.4524	3.73531	4.3746	4.81421	4.74709	4.8189
'Gata1'	3.99181	3	5.40969	5.92648	3.82777	4.26297	4.81798	5.22215	4.20979	4.49805	4.26126	4.70254	5.72816	6.46158	4.43881	6.49271	6.00102	6.93011	4.5099	4.97272	4.18945	4.31363	4.37851	4.3227	4.94017
'Golt1b'	3.45149	3.90689	3	3.8238	3.82777	4.13296	4.16421	4.15659	4.63631	4.31449	4.5117	3.13264	4.26326	4.13721	4.70283	4.63672	4.24891	4.43119	4.61229	4.33207	4.28371	3.79456	4.27302	4.08483	4.09487
'Gp9'	3	3	3.91622	3.8238	3.98637	4.32383	3.77575	4.41809	4.43876	3.71679	4.34966	4.60354	5.12125	5.00532	3.57147	4.84542	5.24514	5.48029	4.15026	4.62321	4.68011	3.79456	3.58496	3.44434	3.86913
'Gypc'	5.25827	4.52356	6.56959	7.46656	5.70455	6.18922	6.20069	6.36657	5.29246	6.0099	6.31768	5.85755	6.96525	7.71075	6.46117	8.03537	7.87755	8.15943	7.2776	6.98989	6.1289	6.29017	5.98489	6.06947	6.28031
'Hba-a2'	9.22249	6.94251	11.6401	12.4154	11.3614	10.2244	10.1263	10.3124	9.25001	9.62193	10.161	11.6833	12.4698	12.4188	10.7557	12.1884	12.6989	12.6692	11.025	11.7419	10.3933	9.3575	10.2585	9.88718	10.3706
'Hemgn'	6.28599	4.70044	8.74355	9.75023	7.55031	7.97528	7.68622	8.00098	7.07328	7.88182	7.86075	7.80017	9.07492	9.72339	7.9036	10.0383	9.95771	10.33	8.92758	8.61362	7.83847	7.76369	7.29645	7.33495	7.92808
'Hist1h2ak'	3.45149	3	4.90583	5.38121	3.44621	5.15962	3.33185	4.73848	4.08007	4.49805	4.16709	4.3825	3.61689	5.37343	4.8733	5.42444	6.45059	7.30475	4.15026	4.92004	3.73531	4.78718	3.58496	3.94936	3.74147
'Hist1h3b'	3	3	5.88156	5.74529	4.59092	5.61411	5.37532	4.8312	4.81004	4.58175	4.5117	5.37777	5.35309	7.33787	4.81868	6.81557	6.99991	7.97154	4.39969	5.12012	4.81249	4.54343	4.4285	5.00798	5.29875
'Hist1h4i'	3.7468	4.45943	4.05864	4.33217	3.98637	3.91293	4.46995	4.53298	5.23266	4.40919	4.43296	4.25783	4.19662	5.1806	4.57685	5.68186	5.34442	6.01326	3.6701	4.41055	4.28371	4.24997	4.27302	4.14807	4.37851
'Hmgb3'	3.45149	3.32193	4.41703	5.0048	3.82777	3.33622	4.34676	4.41809	4.43876	3.38524	3.95802	4.60354	5.2252	5.93456	4.50948	6.13029	5.49607	6.02711	4.5099	4.41055	3.73531	3.70243	4.27302	3.63301	4.19574
'Hmmr;IHABP'	4.69204	3.90689	6.02727	6.90019	5.56067	5.34721	5.53434	5.99792	5.60701	5.46577	4.65737	5.67456	6.81786	7.05239	5.47746	7.39349	7.03995	7.69598	6.28687	6.02633	5.72071	5.24459	4.88752	5.31404	5.82496
'Immp1l'	3.07975	3.16993	3.75819	3.22879	3.20941	3.21293	3	4.00561	3.60159	3.56052	3.5736	3	4.05334	4.04955	3.9217	4.20348	4.24891	4.15647	4.39969	3.47684	3.73531	3.26066	3.29278	3.94936	3.6014
'Isg20'	5.79877	4.64386	7.38401	7.92997	6.16888	6.17277	5.98354	6.73385	5.74182	5.85029	6.36086	7.77764	7.99422	8.42333	6.87658	8.30044	8.10695	8.54137	7.14724	7.10055	6.20313	6.44033	6.33866	6.08571	6.58928
'Itpa'	4.69204	4.24793	4.56757	5.15768	5.01565	4.32383	4.96486	5.15198	5.10507	4.73586	5.12637	5.21962	5.94666	5.5435	5.40516	5.58821	5.279	5.94189	5.17745	5.25385	4.53434	5.10763	5.31711	4.82657	5.29875
'Kel'	3.7468	3	6.25145	7.45677	5.40083	5.31759	5.47674	5.35301	4.32881	4.93996	4.96782	5.46495	6.67831	7.13988	5.24869	7.60911	7.37346	7.86369	5.77137	6.19102	5.24619	5.24459	4.61274	4.74709	5.25267
'Kif18b'	4.20119	3	4.94303	5.71275	4.12924	4.43835	4.21206	4.58716	3.16294	4.21315	4.43296	4.49725	5.52589	5.88478	4.28615	6.36299	5.95987	6.79084	4.79754	4.80852	3.73531	4.59559	4.47681	4.08483	4.88081
'Kif23'	4.38399	3.70044	5.32766	5.74529	5.08742	5.01947	4.90789	5.32139	5.40511	4.87508	4.96782	5.31657	5.52589	6.07437	4.70283	6.40754	6.34266	6.68118	5.4226	5.41481	4.68011	5.48477	4.85133	4.93813	5.54805
'Kif4'	3.99181	3	4.90583	5.61047	3	4.77986	4.68866	4.8312	4.20979	4.31449	4.65737	3.71009	5.52589	5.88478	4.43881	6.06226	5.82884	6.17137	5.30523	4.80852	3.73531	4.3746	4.03562	4.26681	3.86913
'Klf1'	4.82446	3.16993	6.70571	7.59709	5.95531	5.77532	6.22422	6.21994	5.7841	6.18069	6.05387	5.94102	7.53629	8.13476	6.12094	8.18682	8.11634	8.47719	7.21389	6.62873	5.72071	5.91244	5.84465	5.49521	6.34762
'Mad2l1'	4.20119	3	4.36315	4.83377	3.82777	4.26297	4.50878	4.15659	3.93751	5.06157	4.65737	4.60354	4.8007	6.07437	4.92592	5.16378	5.34442	5.66889	4.61229	4.74936	4.60907	4.83135	4.69673	4.3227	4.19574
'Mcm5'	5.86177	4.64386	6.1596	6.06183	5.4561	5.99706	6.23584	6.33525	5.65336	6.09782	5.82632	6.00059	6.80673	7.27162	6.54767	7.33126	6.59199	7.34404	6.68949	5.89601	5.68661	6.03082	6.20163	5.78111	6.41194
'Mgst3'	3.45149	3	5.40969	5.98215	4.86042	3.83145	4.11472	4.95999	4.08007	3.85778	4.78966	4.44102	5.75156	6.49515	4.43881	6.61173	6.85028	6.95207	5.85727	5.41481	4.87438	4.3746	4.27302	4.01868	4.61545
'Mns1'	4.20119	3.58496	5.08295	6.0092	4.59092	4.49237	4.78672	5.32139	5.10507	5.11873	4.65737	4.92385	6.23928	6.33754	4.70283	6.83201	6.13648	6.82297	5.4226	5.33657	4.87438	5.24459	4.81421	4.47845	4.61545
'Morf4l2'	3.99181	3.32193	3.37827	3	4.4886	4.13296	3.95516	4.15659	4.08007	4.49805	3.8409	4.25783	4.38796	4.5741	3.81414	4.99888	3.66772	4.38888	5.24275	3.96692	3.98018	3.88115	3.96962	4.08483	4.6865
'Mpo'	3	3	3	3.22879	3.44621	3.4498	3.6424	3.16578	3	3	3	3.2681	4.05334	4.50987	4.2033	4.81267	4.3795	4.15647	4.61229	3.96692	3.5953	3.79456	4.03562	4.3227	4.19574
'Mt2'	4.94574	3.90689	5.40969	5.89782	5.22106	5.53909	5.83864	6.30323	5.34988	6.30904	5.6285	5.62495	7.17016	8.08602	6.2296	6.96464	6.45059	7.01601	5.63208	6.05104	6.02356	5.42837	6.21593	6.01961	5.91648
'Myo1d'	3.7468	3	4.46898	4.77193	4.12924	3.83145	3.95516	4.73848	3.39888	3.85778	4.16709	4.3825	5.2252	5.90988	4.0218	5.44596	5.31208	6.09448	4.5099	5.16609	3.5953	3.38442	3.67054	3.94936	4.6865
'Ncapd2;Scarna10'	3.7468	3.90689	5.24069	6.23222	4.25923	5.2249	5.28872	5.80564	4.63631	5.06157	5.17557	5.25267	5.65559	6.31891	5.24869	6.53349	6.37433	6.6986	5.30523	5.41481	4.53434	5.10763	5.11825	4.93813	5.20506
'Nek2;nek2'	3	3	3.37827	4.24383	3	3.07811	3.0453	3.64597	3	4.10414	3.5736	3.61163	4.38796	5.26085	3.43289	4.84542	4.66207	5.57767	4.15026	3.61582	3.5953	3.96284	3	3.10505	3.07468
'Optn'	3.07975	3	4.36315	5.50039	4.4886	3.55508	3.77575	4.15659	4.43876	3.98621	4.06634	4.7496	5.19138	5.63668	4.2033	5.94626	5.40701	6.19611	5.03725	4.74936	4.18945	4.48932	4.03562	3.54176	3.6014
'Orc1;Orc1l'	3	3	3.37827	4.33217	3	3	3.24251	3.54006	3.39888	3	3.24524	3.13264	4.60904	5.1806	3.81414	5.23967	5.02338	5.41854	3.22931	3.96692	3	3.79456	3	3	3
'Pcbd2'	4.54622	4.16993	3.91622	4.33217	4.86042	4.73575	4.84858	4.8312	4.81004	5.22669	4.91084	4.88222	4.55686	4.5741	5.20677	5.31176	5.06279	5.19125	4.70788	4.80852	4.81249	5.17773	4.52356	4.78738	4.46189
'Pi4k2b'	3	3.45943	4.41703	5.05758	3	3.99007	4.01033	4.41809	3.60159	3	4.26126	4.25783	4.88776	5.80673	3.27957	5.60743	5.52458	5.70382	4.15026	4.16102	3.73531	3.96284	4.27302	4.01868	4.09487
'Pklr'	3.7468	3	4.05864	4.24383	3.82777	3	4.30324	5.25599	3.77931	3.38524	3.24524	4.25783	4.75512	5.5435	3.27957	5.54898	4.55559	5.92719	4.61229	3.47684	3.44022	3.88115	3.49399	3.22723	4.19574
'Pnp'	6.28599	6.32193	6.63925	7.48595	6.43958	6.5619	6.96513	6.75767	6.74977	7.0288	6.61384	7.32067	7.64024	8.59182	7.52296	8.13477	7.80968	8.27717	7.39715	7.40847	7.13128	6.96131	6.76553	6.66358	6.81218
'Prc1'	4.54622	3.70044	5.93794	6.871	5.22106	5.70842	5.55304	5.89427	5.03677	5.91627	5.22315	5.57356	6.61593	7.10769	5.92803	7.18538	7.09801	7.50619	6.01512	6.02633	4.74781	5.73779	5.56071	5.54305	5.46964
'Prdx4'	3.45149	3.45943	4.18825	3.55675	3.82777	4.69025	4.389	3.92375	4.43876	5.06157	4.43296	3.80226	4.75512	4.6356	4.92592	5.05597	4.89825	4.66187	3.84851	4.24908	4.68011	4.54343	4.95729	4.37651	4.61545
'Prtn3'	3	3.16993	3.14272	3.94081	3.82777	3.4498	3.71061	3.16578	3	3.38524	3.04799	4.04795	4.12676	5.5435	5.02574	4.96947	4.89825	4.9795	5.10906	5.2958	3.98018	4.04016	5.02384	3.87654	4.19574
'Ptdss2'	3	3.58496	5.56096	6.23222	4.94012	4.73575	4.87854	5.11557	5.17028	4.66086	4.72503	4.70254	5.94666	6.42721	5.1191	6.69495	6.73303	7.12956	5.17745	5.59364	4.93373	4.11354	5.02384	4.70565	5.54805
'Pycr2'	4.20119	5.20945	5.01469	5.29591	5.22106	4.86423	5.5715	5.47298	5.17028	5.32712	5.31384	5.59948	5.77458	6.20181	5.47746	6.06226	5.70976	6.05444	5.68002	5.86847	5.38023	5.51216	5.53812	5.16911	5.42878
'Rhd'	5.79877	3	7.53785	8.49633	6.64381	6.37323	6.56549	6.84921	5.60701	6.30904	6.50256	6.63553	7.62131	8.40137	6.25038	8.74431	8.65675	9.07087	7.04111	7.40847	6.29653	6.24189	6.14295	5.56639	6.51314
'Rps29'	4.20119	4.70044	4.65985	5.1085	4.77606	4.86423	5.4962	5.38395	4.96508	5.22669	5.35713	5.25267	5.70437	6.30004	5.3676	5.96128	5.68472	5.52003	5.36511	4.80852	4.37218	4.99563	5.31711	4.82657	5.54805
'Rrm2'	5.51501	4.24793	6.75884	7.80433	6.49341	6.26876	6.34717	6.63443	5.69827	6.49324	6.33943	6.40509	7.31856	8.02413	6.54767	8.26456	8.04434	8.43883	6.96575	6.62873	6.02356	6.38212	6.09733	6.19457	6.43275
'Sept8'	3.07975	3	4.94303	5.53802	4.25923	3.74508	4.78672	5.07822	4.54091	4.66086	4.58637	4.12135	5.2252	6.65218	4.76192	6.28156	5.82884	6.61848	4.88195	4.74936	4.60907	4.59559	4.92283	4.14807	4.8189
'Siva1'	4.69204	3.58496	4.8284	4.77193	4.37847	4.5947	5.1234	5.03988	4.32881	5.00205	4.65737	5.25267	5.52589	5.93456	5.1191	5.68186	5.57996	5.94189	5.10906	5.2958	4.45554	4.78718	4.73696	4.26681	5.05203
'Slc38a5'	3	3	4.70387	6.08744	4.59092	4.13296	4.25837	5.11557	4.08007	5.17372	4.5117	4.55138	5.94666	6.222	3.81414	6.60217	6.6054	6.76626	4.39969	4.68767	3.86293	3.79456	4.47681	4.47845	4.6865
'Slc43a1'	4.20119	3.32193	6.30959	7.12705	5.70455	5.34721	5.5154	5.68659	5.7841	5.7453	5.51838	5.9206	6.39599	6.98311	5.3676	7.3485	7.71391	7.86369	6.01512	6.41694	5.29227	5.3394	5.02384	5.07461	5.46964
'Slc43a3'	3.99181	3.32193	6.06151	6.8412	4.86042	4.82266	5.4962	6.07578	5.45829	5.17372	4.96782	5.57356	6.53733	6.935	4.92592	7.25408	6.74519	7.72178	5.93835	5.69119	5.54154	5.39932	5.56071	5.39448	5.10486
'Spag5'	3	3	3.83937	5.46175	4.59092	3	3.5708	3.64597	3	4.40919	3.24524	3.71009	5.38336	5.51105	4.3645	5.64513	5.70976	5.72097	4.15026	4.62321	3.06882	4.04016	4.1592	3.44434	3.86913
'Spc25'	3	3.45943	4.90583	5.86858	4.4886	5.05581	4.72209	4.63938	3.60159	4.66086	4.85153	4.88222	5.41302	6.07437	4.57685	6.28156	6.07998	6.49428	5.68002	5.12012	4.28371	4.83135	3.96962	4.66299	4.88081
'Spna1'	4.20119	3	7.19646	8.5011	6.51959	6.49731	5.79218	6.23699	4.72579	6.12598	5.6975	6.16584	7.13501	7.75299	5.51229	8.16428	7.91033	8.58886	6.82359	6.88384	6.10327	6.15766	5.66865	5.51933	6.3031
'Spnb1'	4.94574	3.16993	7.80869	9.10682	6.75818	6.83707	6.65476	7.20157	6.11741	6.80327	7.22927	7.16447	8.01853	8.90755	6.69139	8.96715	8.83519	9.61822	7.39715	7.79968	6.77346	6.50992	6.24412	6.17952	7.00521
'Stom'	5.05761	4.08746	6.1596	6.90019	5.15578	4.94394	5.45702	5.35301	3.93751	5.7453	5.88666	5.54717	6.76135	6.99489	5.47746	7.34278	7.31754	7.54041	6.43392	6.07534	5.99599	5.39932	5.46815	5.07461	5.42878
'Tal1'	4.82446	3	6.44544	7.29032	5.28351	5.28735	5.5154	5.68659	4.96508	5.70853	5.31384	5.59948	6.95521	7.59168	5.902	7.76275	7.40447	7.96435	6.43392	5.97561	5.19859	5.07125	5.62644	5.36816	5.76056
'Tipin'	4.82446	3.16993	5.08295	5.80825	4.94012	4.73575	4.93666	5.22215	4.88964	5.22669	4.85153	5.11568	5.77458	6.35592	5.44176	6.31703	6.2603	6.49428	5.47789	5.07264	4.81249	4.99563	5.17791	4.90189	5.10486
'Tk1'	3.45149	3	5.21049	5.74529	5.01565	4.43835	4.5466	5.07822	4.72579	4.21315	4.65737	4.7496	5.41302	6.20181	5.02574	6.22045	5.82884	6.49428	4.79754	4.97272	4.60907	5.24459	4.56884	4.90189	4.75422
'Ttll12'	3	3.90689	4.65985	5.05758	4.25923	4.26297	4.84858	4.78559	4.63631	4.93996	3.95802	4.70254	4.88776	5.88478	4.64121	5.66361	5.49607	6.06791	4.88195	4.55575	4.45554	3.96284	4.27302	4.66299	3.6014
'Tyms'	3	3	3.67218	4.33217	3.44621	3.21293	3.71061	3.74463	3.77931	4.21315	3.41874	3.97061	4.55686	5.22128	3.27957	4.93944	5.17494	5.19125	4.5099	3.32302	3.26643	3.26066	3.49399	3.79984	3.74147
'Ube2l6'	4.20119	3	5.65365	6.34268	5.01565	4.5947	4.11472	4.87542	4.20979	4.93996	4.06634	6.39032	6.71448	7.20218	4.57685	6.61173	6.64489	6.88517	5.17745	5.2958	4.18945	5.07125	4.81421	4.37651	4.61545
'Ube2t'	3.07975	3.45943	3.83937	4.49412	3	4.13296	3.5708	4.58716	3.16294	3.38524	3.5736	4.04795	4.92939	4.8583	4.1154	5.44596	4.66207	5.00773	4.00726	4.48497	3.44022	3.70243	3.96962	3.79984	4.29002
'Uqcr;Uqcr11'	5.05761	4.80735	4.90583	5.29591	5.01565	5.25646	5.77635	6.14966	4.88964	5.6708	5.31384	5.64997	5.65559	6.1395	5.70529	6.01984	6.07998	6.43315	5.58249	5.72229	5.42228	5.59136	5.66865	5.44573	5.91648
'Uros'	3.07975	3.70044	5.80279	6.91457	5.22106	5.05581	5.19658	5.47298	4.72579	4.40919	4.72503	5.21962	6.23928	6.97123	5.64378	7.18538	6.90552	7.40368	5.68002	5.37622	4.99074	5.61682	5.26303	4.82657	5.10486
'Xk'	4.20119	3.32193	4.61445	5.38121	4.86042	4.06328	4.81798	5.38395	4.08007	4.66086	4.91084	4.49725	5.15674	5.95882	4.81868	6.11694	5.63329	6.3025	5.36511	4.97272	4.28371	4.83135	4.88752	4.42838	4.37851
'1100001G20Rik'	5.25827	4.24793	4.70387	4.70733	4.77606	5.19263	4.30324	5.00049	4.63631	5.50917	5.55603	4.70254	5.55278	6.5758	5.76428	6.35164	5.89584	6.04084	6.25557	6.54423	6.65501	6.01175	5.58295	4.93813	5.72724
'1500011K16Rik'	4.20119	4.45943	4.36315	3.40207	4.77606	4.82266	4.81798	4.91833	4.54091	4.73586	4.91084	4.70254	4.88776	4.90899	5.20677	5.16378	5.06279	4.25397	4.70788	5.12012	5.33692	4.83135	4.65535	4.90189	5.25267
'AK153212'	3.7468	3.58496	4.1249	4.14972	3.98637	3.65321	3.49546	4.29326	3.93751	4.58175	3.41874	4.65389	5.04754	5.63668	5.1636	4.74484	4.89825	4.55113	5.58249	5.75273	5.54154	4.74161	4.37851	4.14807	4.37851
'Anxa1;AK170612'	6.19105	5.75489	6.1596	6.03575	6.41189	5.85995	6.16467	6.48546	6.01463	6.09782	6.25038	6.68479	6.62862	7.36535	6.77982	7.15304	6.95872	7.0905	7.19751	7.53648	7.48874	7.06669	6.57894	6.36397	6.36938
'Camp'	6.41763	5.83289	6.25145	7.03791	6.71351	6.52349	6.2588	6.51372	5.50959	5.88366	6.94706	6.23362	7.43875	8.1559	7.1553	8.76372	8.10695	8.38065	8.22527	8.79644	8.9258	8.04263	7.36223	6.76793	6.45327
'Ccr1'	4.82446	4.52356	4.56757	4.95001	5.91643	5.37624	5.14821	5.75919	5.65336	5.7453	5.26921	5.37777	5.2252	5.51105	5.92803	5.4026	4.7125	5.43942	5.63208	5.78255	5.5792	5.93286	5.44405	5.36816	5.82496
'Cdcrel-1;Gp1bb;Sept5'	3.07975	3.16993	3.00875	3	3	3.21293	3	3.30162	3.60159	3	4.06634	3.71009	3.97598	4.6356	3	4.15204	3.94583	4.3453	4.15026	5.07264	3.73531	4.11354	3.18057	3	3.74147
'Chi3l1'	3.7468	3	3	3.03183	3.64957	3.33622	3.49546	4.00561	3	4.40919	3.8409	3.71009	4.50273	4.8583	4.43881	4.39265	3.56167	4.05189	4.39969	4.92004	4.37218	4.48932	3.90046	4.01868	3.44626
'Ctsw'	3.07975	4.80735	3.67218	3	3.20941	4.13296	4.34676	4.35702	4.63631	3.85778	4.34966	3.88889	3.61689	4.29799	4.43881	3.65715	4.24891	3.08428	4.88195	4.74936	3.98018	4.74161	3.75132	4.37651	4.6865
'Dnalc4'	3.7468	3	3.26529	3	4.12924	3	3.71061	3.54006	3.60159	3.98621	3.41874	3.88889	4.12676	3.36953	3.43289	3.23099	3.7665	3.6114	3	4.62321	4.18945	4.24997	4.27302	3.10505	3.98641
'Glrx'	4.82446	5.35755	4.65985	4.83377	4.94012	4.32383	5.31086	5.32139	5.17028	5.17372	5.35713	5.69875	5.35309	5.77974	5.67486	5.48805	5.24514	5.39736	5.47789	6.09923	5.65169	5.80579	5.26303	5.16911	5.34341
'Gm11428'	3.7468	4	4.18825	4.33217	3.98637	4.06328	4.96486	4.87542	5.23266	5.11873	4.5117	5.1858	4.75512	6.09641	5.3676	4.87745	4.44062	4.51225	5.58249	5.69119	5.29227	5.76081	5.11825	4.37651	4.99718
'Gm14446'	6.03579	5.83289	4.78808	4.56874	4.94012	5.01947	5.04631	5.22215	5.23266	5.22669	5.31384	5.96115	5.65559	5.29936	6.09819	5.35789	5.49607	4.9507	6.05202	6.02633	6.07719	5.69061	5.6893	5.80092	6.00254
'Ifitm6'	5.25827	4.75489	5.04922	4.77193	5.28351	4.94394	4.81798	5.15198	5.29246	5.46577	5.55603	5.72253	5.25825	5.90988	5.07317	5.71769	5.31208	5.72097	5.93835	6.29811	5.78658	5.89173	5.53812	5.13829	5.25267
'Klrg1'	3	3.70044	3.14272	3.40207	3	3.07811	3.24251	3	3.39888	3.18568	3	3.80226	4.38796	4.13721	4.64121	3.41681	3.18679	3.08428	4.28036	3.96692	4.53434	4.31363	3.75132	3.10505	3.98641
'Lcn2'	5.51501	5.16993	5.17964	5.46175	6.03007	5.2249	5.1234	5.50148	5.40511	5.70853	5.76335	5.72253	6.51015	6.79378	5.97873	7.05142	7.19874	6.83877	7.14724	7.5452	7.45875	6.97121	6.09733	5.95033	6.00254
'Lrg1'	3.7468	3.80735	3.26529	3.69645	4.77606	4.54444	4.389	4.91833	4.81004	5.17372	3.71343	4.55138	4.05334	5.09562	5.07317	4.74484	4.854	4.73124	5.30523	5.33657	5.50287	4.91583	4.61274	4.90189	4.88081
'Ltf'	5.25827	4.9542	4.70387	5.64537	5.28351	5.56453	5.35416	5.22215	4.63631	4.87508	6.25038	5.37777	6.48244	7.13988	6.36916	7.35988	7.10747	7.28759	7.30843	8.03463	7.5658	6.82596	6.18718	6.19457	5.15583
'Mmp8'	4.69204	4.24793	4.05864	4.14972	4.68645	5.43259	4.81798	5.22215	4.96508	5.55131	5.44001	5.40742	5.35309	6.05199	5.5463	5.58821	5.34442	5.48029	5.89838	5.52475	6.27374	5.59136	4.99095	4.97348	5.20506
'Ngp'	7.51094	7.43463	7.5195	8.33998	8.03172	8.1324	7.64323	7.83176	7.36549	7.26235	8.59825	7.87105	8.81381	9.75318	8.71866	10.0568	9.53047	9.87923	10.1383	10.5164	10.3747	9.6914	8.89986	8.41967	8.02722
'Prg2'	3	3.90689	3.00875	3.03183	3.98637	3.33622	4.06347	3.54006	3	3.18568	3.71343	3	4.12676	4.50987	3.27957	4.20348	3.03654	3.87928	4.15026	4.97272	4.28371	4.31363	4.03562	4.37651	4.19574
'S100a13'	3.7468	4.85798	4.56757	3	4.4886	4.32383	4.78672	4.53298	3.39888	4.58175	4.58637	5.11568	4.70805	4.37213	4.70283	4.39265	4.94117	4.589	4.70788	5.37622	4.93373	4.69456	4.7761	3.87654	4.29002
'S100a8'	8.93086	8.03342	8.20308	8.29123	8.78098	8.585	8.19486	9.04731	8.96772	8.97478	9.09033	8.86529	9.4014	9.99673	9.40799	9.9498	9.589	9.67323	9.84168	10.5558	10.2963	9.84876	9.19705	8.83205	8.91405
'S100a9'	9.30416	8.40939	8.82304	8.85428	9.27933	9.04651	8.70378	9.51389	9.40705	9.51421	9.3694	9.21465	9.90382	10.3451	9.77009	10.4305	10.0695	10.1469	10.1014	10.7053	10.7342	10.2718	9.74774	9.51974	9.53579
'Stx11'	4.20119	3.45943	4.18825	3.69645	4.25923	3.91293	4.01033	4.41809	4.81004	4.80715	4.65737	4.3825	4.92939	5.29936	4.64121	4.34763	4.89825	4.38888	5.03725	4.80852	4.93373	4.48932	4.65535	4.20866	4.94017
'Trem3'	3.07975	3.45943	3	3.03183	3.20941	3.83145	3.14727	3.42576	4.32881	4.10414	4.34966	4.12135	3.97598	5.1806	3.57147	3.50145	3.4472	3.87928	4.00726	5.02354	4.60907	4.11354	3	3.54176	3.98641
'Ccdc104'	3	4.16993	4.05864	4.33217	3.82777	4.5947	4.65443	4.8312	4.43876	3.18568	4.34966	4.1912	4.65939	4.5741	4.28615	4.81267	4.24891	4.8607	4.5099	4.62321	4.45554	4.31363	4.73696	4.52685	4.6865
'Chpf'	3	4.16993	3.67218	3.22879	3.82777	4.06328	4.25837	3.83697	4.43876	4.58175	3.41874	4.1912	3.89423	3.50751	3.9217	4.15204	4.49925	3.81683	4.39969	4.55575	3.73531	3.96284	4.61274	4.52685	3.98641
'Ffar2'	4.38399	3	3.98919	4.41541	5.83537	5.25646	4.96486	5.11557	4.43876	4.49805	4.78966	4.96431	5.38336	5.40908	5.5463	5.28813	5.13852	5.08925	4.88195	5.41481	5.65169	5.66643	6.08179	5.98539	5.72724
'H2-Gs10;H2-gs10'	3	3.58496	3.5807	3	3.64957	3.83145	3.14727	3.92375	3	4.58175	3.71343	3.61163	4.38796	3.95623	4.50948	3.5814	3.4472	3	3.84851	3.74259	3.26643	4.59559	4.03562	4.37651	4.37851

## Sheet: supplementary file 1c
Table S3: Significantly expressed DEGs (10% FDR) between naïve and trained splenic CM, NCM, and Tdtm+/- RPM. Log-ratio values, and corresponding p-value and q-values presented.
NCM				CM				RPM Tdtm-				RPM Tdtm+
sig. genes	log-ratio	p-val	q-val	sig. genes	log-ratio	p-val	q-val	sig. genes	log-ratio	p-val	q-val	sig. genes	log-ratio	p-val	q-val
AW112010	3.7087	1.15401e-05	0.0093177	AW112010	2.73045	0.00116684	0.0845162	Cd8a	3.13492	8.64835e-05	0.0436453	Aif1	0.481108	2.1554e-05	0.0171371
Abcc4	1.75688	0.000444025	0.0532887	Abracl	0.595163	0.00152754	0.0998141	Cep152	1.83428	0.000188814	0.0689949	Anxa1	1.65407	0.000274157	0.0658996
Adcy4	2.3712	3.07409e-05	0.0141832	Abtb2	1.91026	4.16153e-05	0.0142199	Ces2g	3.61419	0.000214836	0.0689949	Atf3	1.94004	0.00037383	0.0750884
Aif1	2.06883	2.74055e-05	0.0139753	Adora3	1.3493	0.00039265	0.0493964	Ciita	2.33879	6.82343e-06	0.0080409	B2m	0.758526	0.000246344	0.060624
Anxa3	2.13122	0.00112072	0.0924819	Apobec3	1.13949	0.000249974	0.0386395	Cxcl9	3.49548	4.93149e-06	0.0080409	Cd74	1.33677	3.96995e-05	0.0227963
Batf2	4.51784	0.000925613	0.0822776	B2m	0.700916	0.000258325	0.0386395	Dnase1l3	1.65495	3.09843e-06	0.0080409	Ciita	2.09123	0.000152716	0.0485668
Birc3	0.827538	0.000562714	0.0592623	Batf2	3.11642	0.00144876	0.0978836	Esco2	3.0283	9.38545e-05	0.0452123	Cxcl9	2.73769	7.9923e-05	0.0346994
Bst1	3.84664	3.64737e-07	0.00117798	Ccl5	2.43462	6.4298e-05	0.0186289	Fcgr4	1.2559	2.41693e-05	0.0160091	Dnase1l3	1.79056	8.74858e-05	0.0361701
C1qa	3.85091	0.000183229	0.0348718	Ccrl2	3.1555	0.000109154	0.0226875	Gbp2	2.53813	7.18271e-06	0.0080409	Fam26f	2.00543	0.000108722	0.0419951
C1qb	3.37754	0.000208442	0.0354315	Cd74	1.69327	0.00133071	0.0942441	Gbp2b	4.23638	0.000300579	0.0884871	Fpr1	1.11429	8.05714e-05	0.0346994
C1qc	3.36222	0.000401107	0.0532887	Cd82	1.91528	0.000702042	0.0657319	Gbp4	4.3024	7.55482e-05	0.04214	Gbp2	2.48479	5.31331e-05	0.0274592
Ccdc163	1.16795	0.00017795	0.0348718	Cfb	3.2988	0.000261887	0.0386395	H2-Aa	2.04732	3.07862e-05	0.0187023	Gbp2b	5.30938	3.02262e-05	0.0209999
Ccl5	3.29058	3.57858e-05	0.0152162	Cflar	0.730648	0.00141368	0.0978836	H2-Ab1	2.48043	1.05229e-07	0.00111521	Gbp4	4.48714	3.58965e-06	0.00530038
Ccr2	0.865355	0.00077699	0.0710212	Ciita	2.10079	2.26501e-05	0.0108279	H2-DMb1	1.40137	7.58719e-06	0.0080409	Gbp5	1.756	0.000377767	0.0750884
Ccr5	3.75908	4.7171e-05	0.0163229	Clcn7	1.49631	0.000488373	0.0536705	H2-Eb1	2.49841	1.94973e-05	0.0145575	Gdap10	1.42718	0.000186239	0.054999
Cd1d1	2.25782	2.67088e-05	0.0139753	Cpq	2.12427	0.0003833	0.0488631	H2-T23	1.92123	1.05348e-05	0.00930398	Gpr18	3.03802	0.000122171	0.0442373
Cd274	1.71873	0.000510118	0.0558689	Csrnp1	2.47033	0.00106431	0.0814071	Hk3	1.09755	0.000121044	0.051313	H2-Aa	1.97476	1.56609e-06	0.00305109
Cd40	2.22156	8.3147e-05	0.0230175	Cxcl10	3.28988	0.000319642	0.0442912	Iigp1	2.71679	0.000340829	0.0950553	H2-Ab1	2.13031	1.20308e-06	0.00305109
Cfb	3.02304	0.000321363	0.0457894	Cxcl9	5.60421	0.000233654	0.0372327	Pcgf3	1.77745	0.000209163	0.0689949	H2-Eb1	2.02539	0.000374455	0.0750884
Chil1	2.28512	0.000469226	0.054775	Dnase1l3	3.56067	4.15805e-05	0.0142199	Ppt1	1.18084	0.000166382	0.0653082	H2-K1	1.03786	0.000454615	0.084213
Clcn7	1.5964	0.000512413	0.0558689	Fam26f	2.69187	0.000516878	0.0561577	Prkar2b	3.79752	4.17482e-06	0.0080409	Hk3	1.29742	2.00138e-05	0.0171371
Clec12a	0.705317	0.00105495	0.0912628	Fgl2	1.73781	7.39314e-06	0.00777822	Serpina3g	2.871	2.18178e-06	0.0080409	Ifi47	2.11998	3.53547e-05	0.0214957
Clec4d	2.80713	0.000189608	0.0352249	Fpr2	1.7703	0.00101663	0.0803307	Serpinb6b	2.55775	0.000149977	0.0611327	Iigp1	3.7666	1.21814e-06	0.00305109
Clec4n	2.4745	0.000525344	0.0565562	Gbp2	3.33954	1.67015e-06	0.00465947	Slamf8	1.99696	0.000183516	0.0689949	Myb	2.58503	0.000401414	0.0782833
Clec5a	3.35923	1.53733e-06	0.00248254	Gbp2b	1.68448	2.13493e-05	0.0108279	Stat1	1.34765	8.65494e-06	0.00833864	Myof	1.33903	0.000456263	0.084213
Cndp2	1.6859	0.00107576	0.0922391	Gbp3	1.68128	7.53373e-05	0.0192826	Ubd	2.71176	8.17029e-05	0.0432944	Nadk2	1.36426	0.000292812	0.0664543
Cp	2.49224	8.22208e-05	0.0230175	Gbp4	4.07496	3.41378e-06	0.00543986	Agap1	-1.42826	1.95221e-05	0.0145575	Ppt1	1.3699	5.61129e-05	0.0276182
Ctsc	1.9654	1.5214e-07	0.00112677	Gbp5	3.36094	0.000819274	0.0705683	Aph1c	-2.22212	2.06041e-05	0.0145575	Serpina3f	3.51826	1.52108e-05	0.0157218
Cxcl10	3.14008	0.00117462	0.0956377	Gbp7	1.76216	3.46736e-05	0.0142199	Ddit4	-2.45014	0.000339791	0.0950553	Serpina3g	2.86947	1.28794e-06	0.00305109
Cxcl9	4.5565	0.00044388	0.0532887	Gbp8	3.76642	8.9489e-06	0.00777822	Fcna	-1.05155	0.000196641	0.0689949	Stat1	1.67708	1.33914e-05	0.0157218
Dram1	1.96199	0.000286165	0.0420099	Gm4951	2.51997	2.15562e-05	0.0108279	Hspa1a	-4.33018	5.62912e-06	0.0080409	Tlr1	1.16764	0.000346835	0.0731609
Enpp4	2.44496	0.000264349	0.0400199	H2-Aa	1.80313	0.000484107	0.0536705	Hspa1b	-3.38726	0.00011248	0.0496691	Ubd	2.67022	0.000202121	0.0575587
Fam26f	2.78179	0.00110718	0.0924782	H2-Ab1	2.26708	1.26048e-05	0.00860818	Mctp1	-2.47379	0.000252323	0.0764033	Vim	3.06331	3.04759e-05	0.0209999
Fcgr4	1.2516	4.28988e-05	0.0159864	H2-DMb1	1.38392	7.31666e-05	0.0192826	Nop56	-2.39892	0.000212987	0.0689949	Wfdc17	2.20971	0.000109701	0.0419951
Flt1	2.09117	0.00041125	0.0532887	H2-Eb1	2.21489	1.76645e-05	0.0105536	Tirap	-2.8854	6.78785e-06	0.0080409	Amz1	-1.33797	0.000505759	0.0910096
Fpr2	2.0296	0.000752522	0.0694399	H2-Q6	3.23532	7.491e-07	0.00465947	Txnip	-0.944032	0.000106815	0.0492187	Atp13a2	-0.929953	0.000237985	0.060624
Frmd4b	2.36855	0.000348551	0.0481486	Ifi44	2.72333	0.000853848	0.0722446	Zc3h10	-0.806077	3.17646e-05	0.0187023	Atxn7l3	-1.8297	0.000206044	0.0575587
Gbp2	4.35804	1.32019e-06	0.00248254	Ifi47	1.73136	2.54341e-05	0.0110534	Zc3h18	-1.58494	0.000232543	0.0724851	Comt	-1.45556	0.000242982	0.060624
Gbp2b	5.04678	2.32587e-07	0.00112677	Igtp	2.41731	2.44349e-05	0.0110534					Ddit4	-2.25505	0.000295752	0.0664543
Gbp4	4.72603	2.09656e-06	0.00290193	Iigp1	4.72938	1.50584e-05	0.00959821					Fam151b	-1.40136	1.49272e-05	0.0157218
Gbp5	3.94093	2.23058e-05	0.0135076	Il18bp	2.23368	7.38592e-06	0.00777822					Gm9888	-2.17808	1.69837e-05	0.0159585
Gbp7	2.96939	3.95211e-05	0.0155339	Il1rn	2.51876	0.000331963	0.0453414					Gm996	-2.60793	0.000287148	0.0664543
Gbp8	3.07611	0.000635155	0.0654683	Il21r	3.56428	8.19873e-06	0.00777822					Hap1	-1.63454	0.000242408	0.060624
Gda	0.919986	2.1254e-05	0.0135076	Il2rg	1.53418	7.17466e-05	0.0192826					Hspa1a	-3.2939	0.000128398	0.0442373
Gm4951	2.58343	2.90705e-06	0.0035208	Irf1	2.02293	0.00029809	0.0419123					Inpp4b	-1.62443	0.000234787	0.060624
Got1	3.15416	2.12282e-05	0.0135076	Irg1	3.53172	4.82086e-05	0.0153683					Kbtbd2	-1.20477	0.000125137	0.0442373
Gpr141	1.3987	0.00020225	0.0352249	Irgm2	1.38652	9.00213e-05	0.0215173					Kdsr	-1.91568	0.000413699	0.0791851
H2-Aa	1.13166	0.000476847	0.0550021	Isg15	1.46017	0.000399542	0.0496106					Mafb	-0.621568	0.000510696	0.0910096
H2-Ab1	1.24882	0.000352828	0.0481486	Lpin2	1.18967	0.00109112	0.0821433					Mtg2	-1.95303	6.07098e-05	0.0285226
H2-Eb1	1.19759	0.000723636	0.0694189	Ly6a	3.08268	0.000672271	0.0657319					Nadsyn1	-1.31606	5.10428e-05	0.0274592
H2-K1	1.01665	6.0714e-05	0.018976	Ly6i	3.16379	3.98061e-05	0.0142199					Prrc2a	-1.8633	0.000145732	0.0485668
Hck	0.532747	0.00119809	0.0959365	Mcm6	1.00898	0.000143949	0.0281232					Sigmar1	-2.72908	6.62182e-07	0.00305109
Hk3	1.52584	0.000442349	0.0532887	Mis18bp1	1.23715	0.000439461	0.0533154					Slpi	-0.773517	0.000338949	0.072987
Ifi204	1.56701	0.000108886	0.027763	Mocs3	1.47022	0.000614998	0.0632257					Syk	-0.989348	0.00017016	0.0517286
Ifi205	3.35243	2.21004e-05	0.0135076	Msantd3	1.34011	3.73119e-05	0.0142199					Tmem91	-2.75346	0.0003159	0.069471
Ifi47	2.51229	0.000203065	0.0352249	Nlrc5	1.42354	0.00087814	0.0723784					Tpmt	-1.58407	1.77114e-06	0.00305109
Igtp	2.49475	6.86361e-05	0.020152	Nt5c3	1.65433	0.000278772	0.0397812					Tsga10	-2.00936	0.00015506	0.0485668
Iigp1	3.86225	9.71678e-05	0.0261516	Oasl2	1.04197	0.00099702	0.0803307					Zbtb3	-1.58015	3.38532e-05	0.0214957
Il15ra	1.75016	0.000697832	0.0689928	P2ry13	2.0997	0.000874928	0.0723784
Il18bp	2.65598	4.58597e-05	0.0163229	Parp12	1.17717	0.000582485	0.0625746
Il21r	3.54655	0.000232127	0.0368701	Parvg	0.931492	0.00121209	0.0871341
Irf1	1.93227	0.000412435	0.0532887	Pla2g16	3.79315	0.0002126	0.0350955
Irf8	1.4933	0.00043841	0.0532887	Prdx5	1.11168	0.000722139	0.0657319
Irg1	4.40958	0.000146854	0.0322902	Prr5l	1.00281	0.000478169	0.0536705
Irgm1	3.44142	0.000461165	0.0544906	Psmb10	0.852737	0.00153165	0.0998141
Klhl6	2.17656	0.00022603	0.0365	Psmb8	1.35033	0.000815055	0.0705683
Klra2	1.25442	0.000120175	0.0291094	Psmb9	2.0536	6.34183e-06	0.00777822
Ly6a	4.97773	3.48704e-06	0.003754	Ralgds	2.77841	0.000100561	0.0225564
Ly6i	2.95367	0.000203591	0.0352249	Samhd1	0.784799	6.0169e-05	0.0179774
Maf	3.16258	0.000183555	0.0348718	Sell	0.739177	1.13092e-05	0.00831747
Mcemp1	1.27915	0.000303592	0.043903	Serpina3g	4.56018	0.000150916	0.0281232
Ms4a6b	1.53339	0.000513194	0.0558689	Slc31a1	1.52927	0.000102608	0.0225564
Ms4a6d	2.65001	0.00108933	0.0924782	Slfn1	0.802918	0.00072837	0.0657319
Mtx2	1.5075	0.000860188	0.0778912	Socs1	3.52058	5.88536e-05	0.0179774
Mvp	0.747178	0.000417446	0.0532887	Stat1	1.93521	1.10348e-05	0.00831747
Mx1	0.960413	0.000493272	0.0558689	Tap1	1.28378	1.83322e-06	0.00465947
Ndufaf1	1.40997	0.000710508	0.0694189	Tcerg1	1.29912	0.00107951	0.0819145
Nrip1	1.84954	0.000221109	0.0363106	Tgm2	1.81623	4.16439e-05	0.0142199
Palb2	1.32167	0.00110333	0.0924782	Tlr12	2.16184	0.000152955	0.0281232
Phf11b	2.29764	5.87034e-05	0.0189592	Tnfaip2	1.34581	0.000106165	0.0225564
Pla2g16	4.35735	0.00015648	0.0324868	Tnip3	2.38354	0.000255783	0.0386395
Psmb9	1.29187	0.000660964	0.0667092	Tns3	1.41654	0.00125354	0.0894407
Psme2b	2.06288	9.40616e-06	0.00828512	Trafd1	1.17391	0.000456061	0.0536705
Rasgrp1	1.47371	0.000607966	0.0633396	Ttc9c	1.37789	0.00153464	0.0998141
S100a1	2.72529	0.00021804	0.0363106	Usp39	2.21052	0.00152394	0.0998141
Saa3	3.56501	0.00014997	0.0322902	Zbp1	1.42864	1.94936e-06	0.00465947
Samhd1	1.14481	8.00136e-07	0.00193813	2510009E07Rik	-1.9386	0.000105366	0.0225564
Scpep1	1.90549	0.00112632	0.0924819	AI504432	-1.40272	0.00026673	0.0386395
Serpina3g	5.26224	3.06562e-05	0.0141832	Adgre5	-0.903495	0.000367297	0.0481058
Socs1	3.28865	0.00055913	0.0592623	Aph1c	-1.47012	0.000643253	0.0654271
Sod2	2.63206	0.000145806	0.0322902	Apoe	-2.96598	4.8222e-05	0.0153683
Stat1	2.64301	3.61206e-05	0.0152162	Arhgap12	-1.78593	0.00111121	0.0823588
Tmem67	2.52837	0.000119476	0.0291094	Ash1l	-0.65562	0.00100336	0.0803307
Tnfaip2	3.47422	4.00812e-05	0.0155339	Btg1	-1.37423	0.000724435	0.0657319
Trip6	1.42159	0.000720707	0.0694189	Calhm2	-1.04212	0.000671471	0.0657319
Upp1	3.12393	0.000345311	0.0481486	Camkk2	-0.989992	0.000213846	0.0350955
Vmp1	0.974875	0.000135244	0.0311995	Ccdc88a	-0.735719	0.00143345	0.0978836
Wars	1.92856	0.00119025	0.0959365	Cd300lb	-0.835335	0.00137541	0.0966932
3110056K07Rik	-2.40611	0.000196988	0.0352249	Clk4	-1.62521	0.00145377	0.0978836
Abhd12	-0.799262	0.000886691	0.0795477	Cln8	-0.711836	0.0014024	0.0978712
Aldh9a1	-0.952191	0.00050893	0.0558689	Dusp6	-1.23684	0.000205872	0.0350955
Apoe	-2.89765	0.000642804	0.0655592	Esco2	-1.64393	0.00104886	0.0814071
B4galnt1	-0.869231	0.00124946	0.0992293	Espn	-0.531865	0.000380994	0.0488631
Cacna1a	-0.835773	2.59224e-05	0.0139753	F13a1	-0.732425	0.000695358	0.0657319
Clec2i	-2.74457	0.000237113	0.0370547	Fam105a	-0.771995	0.000725359	0.0657319
Edem3	-1.53085	0.000444913	0.0532887	Fn1	-1.5322	0.0007476	0.0668019
Fam107b	-1.02977	0.00096118	0.0846625	Fos	-1.28076	0.000446108	0.0533154
Hfe	-0.882183	0.000160942	0.0324868	Gm21967	-1.85515	0.000681829	0.0657319
Il1rl1	-2.81147	0.000743191	0.0694399	Hdac5	-1.21904	0.000863859	0.0723784
Irf4	-1.92143	0.000100612	0.0263468	Homer3	-1.69783	0.00146979	0.0982701
Itgb1	-0.772263	0.00074714	0.0694399	Ifngr1	-0.96211	0.000471922	0.0536705
Klf3	-0.599028	0.00024201	0.0372196	Ikbkb	-0.717913	0.000146675	0.0281232
Klhl25	-1.8736	0.000278875	0.0415695	Il16	-1.42338	0.000264332	0.0386395
Mef2c	-1.5463	5.78555e-05	0.0189592	Ing1	-2.09809	1.87649e-05	0.0105536
Phlda1	-2.03152	0.000445493	0.0532887	Ino80d	-0.960387	0.000342052	0.0460614
Plekhg3	-1.15015	0.000747726	0.0694399	Klf3	-0.496821	0.000592324	0.0629245
Pltp	-1.87619	0.000128944	0.0304718	Kremen1	-1.72468	0.000175949	0.0305863
Ptgir	-0.716667	0.000678906	0.0678136	Krr1	-1.08291	0.000104647	0.0225564
Rfng	-1.97265	0.00104576	0.0912628	Lrp1	-0.738226	0.000610731	0.0632257
Rhbdd1	-1.8613	0.000160312	0.0324868	Lsr	-1.31711	0.00143026	0.0978836
Sec14l1	-1.21607	7.29334e-06	0.00706652	Mbp	-0.697608	0.00072875	0.0657319
Sumo3	-1.90621	6.83068e-05	0.020152	Mef2c	-0.96103	7.66383e-05	0.0192826
				Nav1	-0.826619	0.00113043	0.083139
				Ncdn	-1.38488	0.000170304	0.0301533
				Ncln	-0.972288	0.00110733	0.0823588
				Plxnd1	-1.0051	2.46942e-06	0.00472202
				Ptpre	-0.659838	0.00114048	0.0832373
				Raph1	-1.95275	0.000679444	0.0657319
				Rbpj	-1.06135	7.09513e-05	0.0192826
				Rnf150	-1.97517	0.000128795	0.0262001
				Rsrp1	-0.684589	0.000777168	0.068801
				Serinc1	-1.06294	0.00105241	0.0814071
				Sh2b3	-0.485675	8.39748e-05	0.0205867
				Sh2d1b1	-0.774557	0.000480422	0.0536705
				Ssr1	-0.589087	0.00101423	0.0803307
				St6gal1	-2.1066	0.000461738	0.0536705
				Stra6l	-0.992413	0.000613933	0.0632257
				Sult1a1	-1.6879	0.00101612	0.0803307
				Thbd	-2.03932	0.00044139	0.0533154
				Tm6sf1	-0.832756	0.000834311	0.0712218
				Tmem176b	-1.10137	0.000156632	0.0282558
				Trf	-2.04187	0.000147486	0.0281232
				Trpv4	-1.01095	0.000216571	0.0350955
				Tsc22d3	-2.06539	0.000349612	0.0464256
				Ypel2	-1.64833	0.00105587	0.0814071
				Zfp467	-1.92411	0.00080513	0.0705683
				Zzz3	-1.08284	0.000715806	0.0657319

## Sheet: supplementary file 1d
Table S4: Training induced significant DEGs (10% FDR) in total splenocytes, between naïve and trained mice, with and without Type I and II interferon inhibition. Values are log2-ratio expression per replicate. Replicates are marked at the end of the sample name.
Gene names	DMSO1	DMSO2	DMSO3	Deuc1	Deuc2	Deuc3	Deuc4	Fedra1	Fedra4
'Gins1'	4.77541	5.28277	4.86043	4.98927	4.50189	4.52976	4.49291	3	3.83624
'Rrm2'	6.99186	7.38851	6.89027	7.12343	6.58933	6.65716	6.72646	5.20794	5.99142
'Gtf2f1'	6.93743	6.98105	7.02667	6.97454	6.71361	6.84973	6.66406	5.84575	6.40078
'Mcm5'	7.68958	7.62381	7.82784	7.69902	6.98426	7.23735	7.31095	5.50854	6.46416
'Ccne1'	7.06475	7.21522	6.78767	7.05091	6.30315	6.61535	6.30373	4.73804	5.35224
'Klf1'	8.25451	8.48059	8.08502	8.00763	7.12521	7.53511	7.44318	5.56181	6.36801
'Mcm6'	7.88052	8.00342	7.91155	7.73419	7.16929	7.28257	7.38246	5.66279	6.43282
'Dlgap5;mKIAA0008'	5.67091	5.93526	6.14304	5.84295	5.32131	5.36998	5.54605	3.8777	4.45111
'Fam132a'	8.06444	8.4089	8.23553	7.84557	7.33327	7.5865	7.36687	4.53988	5.75842
'Sphk1'	6.72253	7.09855	6.77581	6.40503	6.13551	6.51283	6.05411	3.8777	4.68194
'Ube2c'	7.3987	7.37424	7.45639	7.19249	7.03279	7.12267	7.06269	5.96919	6.46416
'Sec14l2'	5.89307	6.26412	6.08653	6.04317	5.4697	5.36998	5.30562	3	4.17619
'Hspd1'	5.87	6.18458	6.17952	5.79934	5.84068	5.72478	5.67822	4.64236	5.13572
'Uqcr;Uqcr11'	6.90377	7.01823	7.08552	6.69409	6.82803	6.64336	6.5719	5.80214	6.19196
'Cercam'	5.3427	5.37164	5.4735	5.333	4.75427	4.64505	4.70612	3.25734	4.0162
'Gfi1b'	6.89237	7.0455	6.98606	6.83033	6.38019	6.24688	6.03451	4.31011	5.41775
'Slc38a5'	6.27301	6.51884	6.33313	6.34564	5.94579	5.40312	5.65273	4.42957	4.88087
'Cdca8'	6.67009	7.05448	6.85688	6.74095	6.71361	6.64336	6.50227	5.27328	5.90268
'Slc43a1'	7.0949	7.07227	6.77581	7.05091	6.77196	6.61535	6.65125	5.56181	6.07501
'Asns'	6.64314	6.50581	6.23256	6.18548	5.60424	5.77627	5.46051	3.8777	4.97092
'Birc5'	6.98113	7.30822	7.00651	6.93479	6.45333	6.64336	6.51646	5.33579	6.07501
'Spc24'	6.51521	6.82193	6.62527	6.59555	6.04377	6.26502	5.9945	5.1395	5.70694
'Gata1'	6.62947	6.70137	6.83418	6.25169	5.4697	5.85022	5.60038	3.699	5.05567
'Hat1'	7.22782	7.57474	7.08552	7.10564	6.88201	7.11269	6.78628	6.0081	6.43282
'Atp1b2'	5.79852	6.20084	6.00758	5.75437	4.96901	6.07248	5.57347	3	3
'Lap3'	7.34116	7.6117	7.41874	7.32141	7.21207	7.43453	7.20097	6.54646	6.49484
'Blm'	4.82421	4.85969	4.90468	4.7353	4.1958	4.26722	4.75484	3	3.10272
'C1qbp'	6.86929	7.17462	6.99632	6.93479	6.71361	6.52793	6.77451	6.0081	5.75842
'Dut;Dutp'	7.77275	7.92727	7.68925	7.74572	7.16929	7.46623	7.4653	6.22178	6.03382
'Phactr4'	4.91714	5.37164	5.14498	5.06488	4.75427	4.75181	4.89184	3.8777	3.83624
'Tipin'	5.23852	5.34262	5.06924	5.39291	4.75427	4.69942	4.8476	3.49501	3
'Cdc6;cdc6'	5.89307	5.58492	5.66576	5.61039	5.15589	5.43551	5.09471	3.8777	4.0162
'Narf'	5.3427	5.7707	5.41351	5.45043	4.96901	5.19183	5.30562	4.31011	4.57113
'Ttll12'	6.46991	6.76838	6.4119	6.46208	6.45333	5.87405	5.82233	4.91224	5.28362
'Mcm7;Mir25;Mir93;Mir106b'	7.58016	7.84688	7.65727	7.32141	7.29399	7.10263	6.8771	5.84575	6.19196
'Nup85'	6.61567	6.91359	6.83418	6.62082	6.77196	6.45079	6.27061	5.45322	5.94773
'Tspan33'	7.75398	7.91253	7.55686	7.38179	7.25361	7.26465	6.79795	6.0081	6.58315
'Ndufb10'	7.93154	7.92727	7.92235	7.74572	7.73633	7.52009	7.35902	6.91732	7.10461
'Racgap1'	5.89307	5.79232	6.14304	5.45043	5.4697	5.58738	5.77587	4.17986	4.45111
'Fen1'	7.05456	7.30822	7.33228	6.99401	7.12521	6.67083	6.95214	6.0081	5.80813
'Fntb'	5.58854	5.58492	5.83538	5.55902	5.32131	5.15339	5.27254	4.42957	4.57113
'Uros'	6.91508	6.97161	6.76385	6.51696	6.38019	6.17195	6.45882	5.20794	5.35224
'2210020M01Rik'	5.47085	5.34262	4.90468	4.82502	5.4697	4.94419	4.54924	3.49501	3
'2310061C15Rik'	6.16347	6.41114	6.24982	6.08008	6.38019	6.05173	6.01464	5.56181	5.35224
'2610002D18Rik'	4.50302	5.18805	4.61619	4.7353	4.75427	4.64505	4.09907	3	3
'Hpn'	4.44178	4.85969	4.76763	4.7353	4.75427	4.46847	3.85278	3	3.10272
'Kcnn4'	7.10482	7.26247	7.47852	7.33674	7.29399	6.9201	6.5719	5.92921	5.70694
'Pole3'	6.61567	6.86339	6.96532	6.62082	6.82803	6.55766	5.97407	5.33579	4.88087
'Procr'	4.91714	5.58492	5.35092	4.82502	5.15589	4.94419	4.6557	3	3.39066
'Mtfp1'	5.00444	4.93939	4.76763	5.20516	4.75427	4.64505	4.17264	3.25734	3.39066
'Myo1d'	5.16463	5.53449	5.44381	5.39291	4.96901	5.19183	4.93476	4.42957	4.0162
'Rfc5'	6.12503	6.58228	6.59858	6.37564	6.22176	6.19105	5.86734	5.3957	4.97092
'Pla2g12a'	7.08492	7.34527	7.04656	7.35191	6.93404	6.68437	6.33611	5.71075	5.13572
'AK036466'	4.56177	4.93939	4.44697	4.53715	4.50189	4.19337	4.49291	3	3.10272
'Car1'	8.97254	9.09933	8.91397	8.94605	8.56161	8.38546	8.46854	6.51978	6.66636
'Cpox'	7.49981	7.51746	7.30777	7.5752	7.25361	6.87357	7.14724	5.66279	5.94773
'Gm4841'	4.61821	4.77533	4.86043	4.82502	4.75427	4.26722	4.70612	3	3
'Pole'	5.20205	5.45536	5.38255	5.13673	5.15589	4.80236	5.16849	3.25734	3
'AK182549;Slc11a2;Nramp2'	5.5309	5.7707	5.74091	6.04317	5.7273	5.67138	5.05635	4.03667	4.17619
'Kif23'	5.98179	6.24855	6.24982	6.28369	6.22176	6.05173	5.91098	5.20794	5.35224
'Mt2'	6.73535	7.16637	7.26598	7.14101	7.33327	6.8617	6.48793	4.17986	4.68194
'Lgals9'	7.73496	8.67356	8.18708	8.26172	8.4588	7.95381	7.86542	6.40785	6.61142
'Hist1h2an'	4.91714	4.90009	5.02983	5.2705	4.75427	4.69942	5.01695	3	3.39066
'Il18bp'	5.74882	5.79232	5.92405	6.11608	6.13551	5.75076	5.67822	4.17986	4.17619
'Wars'	7.67634	7.85718	7.99066	7.81305	8.18589	7.78181	7.51565	6.18829	6.07501
'Ly6i'	5.47085	5.97362	5.94539	5.88528	6.30315	6.2099	5.16849	3.699	3
'Psmb10'	8.40247	8.60495	8.65045	8.48459	8.85942	8.52747	8.26916	7.53872	7.30834
'Tnfaip2'	7.86894	7.85204	7.79882	7.86685	8.0744	7.83742	7.89832	5.96919	6.19196
'Rnaseh2a'	6.21928	6.32473	6.10562	6.56983	6.45333	6.17195	6.01464	5.06765	5.05567
'Mns1'	7.0443	7.38851	7.02667	7.05091	7.12521	7.0196	7.26964	4.91224	5.54047
'Rad51ap1'	5.3427	5.45536	5.41351	5.39291	5.32131	5.46719	5.51809	3.699	4.0162
'Saa3'	6.54463	6.6069	5.98714	6.78633	6.22176	6.30062	6.18431	3	3
'Spata24'	5.20205	5.34262	5.28548	5.50575	5.15589	5.19183	5.20402	4.17986	3.83624
'Cenpm'	6.20092	6.04742	5.74091	6.15119	5.84068	6.05173	5.60038	4.73804	3.83624
'Cxcl10'	6.99186	7.08984	6.82269	6.69409	6.88201	6.83766	6.70182	5.1395	3.63058
'Serpina3f;Serpina3g'	9.58869	9.47189	9.44085	9.54991	9.55139	9.6042	9.31025	8.17337	7.21928
'Gbp2'	8.13868	8.29611	8.26553	8.26172	7.79378	8.19993	8.31455	5.84575	4.45111
'Igtp;Irgm2'	8.57994	8.91694	8.95926	8.60346	8.47645	8.69403	8.63395	7.32424	6.77033
'Khsrp'	6.94848	7.12435	7.1328	6.91449	6.88201	7.00888	6.95214	6.37846	6.07501
'Kif2c'	4.72489	4.77533	4.94761	4.42685	4.50189	4.80236	4.37319	3.699	3.10272
'Mrpl18'	6.65668	6.66667	6.95483	6.64566	6.38019	6.5868	6.20199	5.50854	4.68194
'Tap1'	8.55846	8.65892	8.8949	8.63481	8.54497	8.45427	8.47218	7.90104	7.44029
'Orc6'	5.84657	5.81363	5.85806	5.61039	5.4697	5.19183	5.62679	4.03667	3
'Irgm1'	8.17206	8.32607	8.38358	8.00763	7.92813	7.95939	8.28168	6.99684	5.94773
'Cfb;C2'	7.72856	8.29232	8.10886	7.95892	8.0744	8.37715	7.74397	5.96919	6.03382
'Mt1'	6.00315	6.35411	6.26687	5.79934	6.13551	5.8975	5.23868	4.42957	4.57113
'Tmem33'	4.96145	5.05124	4.66846	4.63962	4.75427	4.58856	4.24263	3.49501	3.63058
'Ccdc34'	7.0949	7.07227	7.01663	7.06938	6.52293	6.9315	7.06269	5.33579	5.75842
'Hdgf'	8.17677	8.49385	8.31965	8.33227	7.82167	8.29126	8.23951	7.05374	7.27337
'Mmp14'	6.20092	6.39709	6.77581	6.59555	5.4697	6.71108	6.28726	3.699	4.17619
'Dhfr'	5.67091	6.18458	5.85806	6.11608	5.32131	5.98764	5.97407	4.53988	4.57113
'Top2a'	7.76652	7.93215	8.17358	8.10039	7.58182	7.95939	8.15581	6.34845	6.55431
'Upp1'	4.67254	5.25188	5.53109	5.333	4.75427	5.30134	4.97644	3	3
'Mcm10'	5.00444	4.90009	5.06924	4.7353	4.75427	4.26722	5.01695	3	3.63058
'Ncapg2;Mtb'	4.77541	5.08668	4.98931	4.90948	4.75427	4.75181	5.05635	3.8777	4.17619
'Pa2g4'	7.38249	7.32315	7.43392	7.25839	7.25361	7.22813	7.31908	6.18829	6.77033
'Tyms'	5.16463	5.313	5.4735	5.45043	4.96901	5.07331	5.27254	3.25734	4.17619
'Gars'	6.85762	6.97161	7.2912	6.76382	6.77196	6.81322	6.58543	6.15401	5.70694
'Cxcl9'	8.20007	8.35906	8.13231	8.20436	8.0744	8.59355	8.35462	6.83315	5.48041
'Gatm'	5.72332	5.63366	5.61339	5.70796	5.7273	6.24688	5.97407	4.42957	3.63058
'Stat1'	9.95339	9.85122	9.9433	9.83007	9.75314	10.1736	10.1946	8.99804	8.38791
'Dpy19l1'	4.87143	4.77533	4.98931	4.7353	4.75427	4.8512	5.05635	3.8777	3.83624
'IIGP;Iigp1'	7.72214	7.8674	7.97518	7.66298	7.73633	8.18572	8.42027	5.3957	4.32019
'Nampt'	6.04493	5.85532	5.96642	5.88528	5.84068	5.96562	6.18431	4.99204	4.45111
'Lmnb1;AK079263'	6.32481	6.45247	6.55759	6.43384	6.30315	6.48214	6.62528	5.71075	5.48041
'Tgtp2;Gm12185'	4.61821	5.08668	5.63981	4.98927	4.96901	5.30134	5.40054	3	3
'Kif4'	5.64397	5.6095	5.50258	5.96638	4.96901	5.26575	5.13207	3.8777	4.32019
'Larp7'	5.47085	5.91568	5.63981	5.79934	5.60424	5.55826	5.70326	4.82777	4.78483
'Cenpn'	4.82421	5.45536	5.06924	4.90948	4.50189	4.52976	4.09907	3.25734	3
'Isg20'	7.97	8.17375	8.15538	7.8982	7.70673	7.76916	7.61136	7.12627	7.18206
'Eif2b3'	4.72489	4.63875	4.44697	4.53715	4.1958	4.26722	4.02155	3.49501	3.10272
'Mgat4b'	6.06538	6.02932	6.0476	6.18548	5.60424	5.67138	5.48959	4.91224	4.68194
'Fam109b'	4.44178	4.81812	4.7189	4.7353	3.80676	4.11554	4.17264	3	3.39066
'Ifrd2'	6.55912	6.81138	6.73962	7.19249	6.58933	6.60115	6.4291	4.82777	5.48041
'Optn'	5.79852	6.23282	5.76511	6.11608	5.7273	5.85022	5.75207	4.53988	4.97092
'Whsc1;mKIAA1090'	6.48517	6.70137	6.57138	6.85183	6.38019	6.61535	6.33611	5.33579	5.54047
'Abhd16a'	6.98113	6.91359	7.04656	7.05091	6.58933	6.24688	6.47345	5.80214	5.80813
'Alad'	8.03882	8.4124	8.25275	8.17906	7.51507	7.30903	7.19216	6.40785	6.36801
'Aurkb'	5.93811	6.11763	6.16139	6.04317	5.4697	5.22926	5.43084	4.73804	4.45111
'Nasp'	6.27301	6.51884	6.54367	6.34564	6.04377	5.75076	6.16642	5.33579	5.28362
'Mthfd1'	6.45449	6.56982	6.87923	6.315	6.30315	5.8975	5.88932	5.33579	4.68194
'Smyd2'	4.91714	5.12127	5.35092	4.7353	4.50189	4.26722	4.37319	3.699	3
'Ppap2a'	5.3088	5.40009	5.18141	5.20516	4.96901	4.94419	4.89184	4.64236	4.32019
'Prdx3'	6.42315	6.58228	6.30038	6.34564	6.04377	6.00932	5.77587	5.56181	5.21156
'Fbxo31'	5.12622	5.22032	5.10761	4.90948	5.15589	5.11391	4.49291	4.17986	4.0162
'Batf2'	5.16463	5.25188	4.61619	5.13673	5.4697	5.22926	4.8476	3.49501	3
'Zbp1'	7.95364	7.98005	8.05588	7.92888	8.16427	8.05631	7.73793	6.97737	5.85618
'Tacc3'	6.29049	6.35411	6.23256	6.04317	6.13551	5.40312	5.54605	4.91224	4.57113
'2410002O22Rik'	4.91714	5.01491	4.7189	4.98927	4.50189	4.98853	4.54924	3.49501	4.0162
'Cdc20'	5.27409	5.83463	4.90468	5.13673	4.75427	5.52854	4.8476	3	3.63058
'Capn5'	5.43986	5.79232	5.55905	5.9264	6.04377	5.69833	5.36959	4.31011	4.57113
'Ssbp3'	6.34168	6.64306	6.52961	6.71771	6.71361	6.52793	6.44404	5.71075	5.90268
'Cdkn1a'	5.43986	5.87572	5.66576	6.08008	6.13551	5.64392	5.70326	4.31011	4.32019
'Ssx2ip;mKIAA0923'	5.23852	5.50859	5.28548	5.61039	5.94579	5.03154	5.33796	3	3.63058
'Ccnb1'	5.67091	5.83463	5.55905	5.13673	5.7273	4.89844	5.09471	3.25734	4.32019
'Fam96a'	6.42315	6.49266	6.14304	6.04317	6.38019	5.96562	6.14829	5.3957	5.65356
'Anln'	4.67254	4.85969	5.14498	5.20516	4.1958	4.80236	4.6557	3.49501	3.10272
'Pcyt1a'	5.23852	5.7707	5.69124	5.70796	4.75427	5.36998	5.60038	4.17986	3.83624
'Fam82a2'	5.61652	5.93526	6.47195	6.15119	5.60424	5.8975	5.72787	4.73804	4.45111
'Lig1'	6.88088	7.05448	7.10462	6.89391	6.82803	6.98719	6.78628	5.27328	5.90268
'Phf10'	5.64397	5.85532	5.21694	5.06488	4.96901	5.26575	5.16849	3.8777	4.32019
'Atpif1'	8.49205	8.70241	8.35197	8.19598	7.70673	8.01403	7.82035	7.10847	7.56118
'Hmbs'	7.82764	7.9563	7.76322	7.62601	6.71361	6.98719	6.93109	5.92921	6.40078
'Gmnn'	7.26366	7.27019	7.1328	6.89391	6.45333	6.62942	6.38336	5.75717	5.99142
'E2f4'	7.89773	8.21836	7.92235	7.83481	7.44507	7.66373	7.42071	6.89673	7.04367
'Exosc8'	6.51521	6.89371	6.96532	6.43384	6.58933	6.52793	6.28726	6.0081	5.65356
'2810417H13Rik'	6.34168	6.32473	6.17952	6.18548	5.94579	6.5868	6.11136	4.73804	4.78483
'5730508B09Rik'	6.27301	6.06529	5.85806	5.88528	5.84068	6.1526	5.9945	4.82777	4.78483
'Spire1;AK053505'	5.69735	5.83463	5.96642	5.50575	5.84068	5.46719	5.97407	4.03667	4.68194
'Aplp2'	5.98179	6.43883	6.28372	6.28369	5.84068	5.92057	5.60038	4.99204	5.21156
'Chaf1b'	6.21928	6.84281	6.76385	6.62082	6.30315	6.1526	6.05411	5.3957	5.41775
'Cdc25c'	5.27409	5.34262	4.86043	5.20516	4.75427	4.89844	4.43429	3.8777	3.83624
'Rfc3'	6.53	6.39709	6.0476	6.04317	6.22176	6.22851	6.16642	5.33579	5.28362
'BC024659'	4.44178	4.63875	4.25522	3.87504	4.50189	4.26722	3.93963	3	3.39066
'Fam195a'	5.20205	4.90009	5.02983	5.06488	5.15589	4.80236	4.54924	4.03667	4.0162
'Nt5c2'	5.79852	5.63366	5.71629	5.75437	5.94579	5.43551	5.33796	4.82777	4.57113
'Mpst'	6.02419	6.10039	5.92405	6.34564	6.38019	6.00932	5.91098	4.64236	5.28362
'Gbp3'	6.91508	6.72406	6.71498	6.34564	6.45333	6.62942	6.84371	5.80214	4.88087
'Psmb2'	6.43891	6.56982	6.48658	5.9264	6.22176	6.52793	6.30373	5.50854	4.88087
'Ptpmt1'	5.3427	5.37164	5.28548	4.82502	5.15589	4.80236	4.8476	4.42957	4.0162
'Cct6a'	7.14379	7.17462	7.20535	6.74095	7.03279	6.87357	7.13809	6.15401	6.07501
'Tonsl;Nfkbil2'	5.00444	5.6095	4.86043	4.63962	4.50189	4.80236	4.60345	3.699	3.63058
'Timeless'	5.5309	5.89584	5.63981	5.45043	5.7273	5.85022	5.48959	3.8777	4.68194
'Nusap1'	5.5309	5.313	5.25162	5.2705	4.75427	5.03154	5.36959	3.49501	4.32019
'Txn1'	8.6185	8.75291	8.29907	8.45679	8.36714	8.35615	8.43903	7.81589	7.69931
'Gbp10;Mpa2l;Gbp6;Gbp4'	9.00201	8.95579	9.01331	9.18507	9.25675	9.69564	9.65798	6.83315	7.12437
'Gm4951'	4.91714	5.18805	5.44381	5.66	5.60424	5.92057	5.54605	3	3.39066
'Gbp5;Gbp1'	6.54463	6.71276	6.76385	6.76382	7.12521	7.20952	7.34317	5.20794	4.88087
'Gm12250'	7.33275	7.67709	7.59787	7.2744	8.20719	8.07185	8.08136	5.50854	5.35224
'Socs1'	6.61567	6.32473	6.54367	6.315	7.16929	6.77576	6.82101	4.99204	4.88087
'Irg1'	4.72489	4.85969	5.14498	5.13673	5.84068	5.07331	5.20402	3	3.10272
'Irf1'	8.25451	8.00805	8.33185	8.28562	8.62629	8.65674	8.71004	7.16121	7.34247
'Npat'	4.44178	4.19498	4.32201	4.90948	4.75427	5.03154	5.01695	3	3.10272
'Ltb4r1'	4.0892	3.98566	4.25522	4.42685	4.50189	4.40445	4.6557	3.25734	3
'Dclre1a'	4.82421	4.81812	4.7189	4.63962	3.80676	4.64505	4.43429	3.49501	3.39066
'Rps27l'	6.68338	6.55724	6.51541	6.40503	5.4697	6.38597	6.32001	5.06765	4.88087
'Hmgb3'	5.12622	5.15505	5.02983	4.63962	3.80676	4.80236	4.30939	3	3
'Psat1'	4.77541	4.85969	4.98931	4.3074	3.80676	4.64505	4.17264	3.25734	3
'Ndufb9'	7.86894	7.67709	7.71433	7.66298	7.29399	7.3939	7.54365	6.89673	6.77033
'Kif22'	5.43986	5.74874	6.0476	5.39291	4.1958	4.8512	5.23868	3.699	3.39066
'2810026P18Rik;AF357374'	4.56177	4.63875	4.38584	4.53715	4.1958	4.26722	4.93476	3	3.39066
'Ppa1'	6.51521	6.66667	6.7025	5.96638	6.04377	6.24688	6.11136	5.06765	4.68194
'Ccdc142;Mrpl53'	5.87	5.85532	5.76511	5.66	5.84068	5.49819	5.70326	5.1395	4.45111
'Gng12'	5.3088	4.77533	4.98931	4.7353	4.75427	4.40445	4.6557	3.8777	3
'Gadd45g'	5.4082	5.63366	5.88039	5.61039	5.7273	5.92057	5.79929	4.82777	4.97092
'Ly6c2'	7.45402	7.39559	7.26598	6.89391	7.16929	7.45047	7.06269	6.51978	6.40078
'Kif15'	4.82421	4.73122	5.31857	5.333	5.15589	5.03154	5.01695	3	4.0162
'Rgs12;Mir3097'	6.46991	6.75742	6.51541	6.74095	6.71361	5.96562	6.21945	4.31011	5.28362
'Sdsl'	4.91714	4.77533	4.76763	4.90948	4.96901	4.64505	4.43429	3	3.83624
'Steap3'	4.37782	5.01491	4.18519	4.90948	4.50189	5.15339	4.97644	3	3
'Gp49a;Lilrb4'	6.39111	6.54455	6.42715	6.83033	6.45333	6.41875	6.28726	5.80214	5.59812
'Wdr62'	4.16695	4.31936	4.44697	4.82502	4.1958	4.69942	3.93963	3	3
'1110038B12Rik;Snord52;AF357376'	6.79778	6.54455	6.67721	6.25169	6.98426	6.48214	6.48793	5.66279	5.13572
'Ppat'	4.96145	4.59019	4.56196	4.17716	5.15589	4.8512	4.24263	3.25734	3.10272
'Psmd7;AK158379'	7.03396	7.1072	7.10462	7.48173	7.70673	7.67055	7.50144	6.15401	6.40078
'Trfr2'	4.77541	5.28277	5.44381	4.7353	5.94579	4.52976	4.80197	3	3
'Ffar2'	7.12444	6.89371	7.33228	7.20925	7.64563	7.31775	7.5643	6.40785	6.11506
'1500011H22Rik'	4.87143	4.68573	4.61619	4.42685	4.1958	4.19337	4.43429	3.699	3.83624
'Larp1'	7.12444	7.27788	7.26598	7.20925	7.54883	7.57201	7.33519	6.78916	6.52488
'Hspa4l;apg-1b'	4.56177	4.53994	4.7189	4.17716	3.80676	4.40445	4.37319	3.25734	3.63058
'Sfrs3;Srsf3'	6.85762	6.6899	6.7025	6.40503	6.13551	6.33537	6.65125	5.50854	5.80813
'Isg15'	7.44624	7.7781	7.89519	7.42547	7.76534	7.67055	7.5367	6.78916	6.95818
'Cdc25a'	5.79852	5.72645	5.58647	5.66	6.13551	6.09293	6.01464	4.42957	5.13572
'Cenpe'	5.23852	5.63366	5.78892	5.55902	5.60424	6.00932	6.16642	4.42957	4.68194
'Nolc1'	6.83398	6.91359	7.12346	6.9548	7.16929	7.46623	7.41314	5.84575	6.40078
'C4a;C4b'	3.91989	4.81812	4.94761	5.333	4.96901	4.98853	4.43429	3	3
'Hk3'	5.47085	5.95457	5.63981	6.37564	6.04377	5.8975	5.72787	4.73804	4.57113
'Armc6'	4.91714	4.85969	5.18141	5.333	5.60424	4.89844	5.01695	4.03667	4.0162
'H2-T10;H2-T22;H2-T9;H2-t9;H2-T23'	7.86894	7.90759	7.94901	8.18755	8.42283	7.94821	7.89832	7.32424	7.35925
'Picalm;mKIAA4114'	6.72253	6.41114	6.28372	6.315	6.22176	6.05173	6.39877	5.61319	5.59812
'Pdap1'	6.79778	6.80075	6.76385	6.97454	6.98426	7.27363	7.30279	6.2545	6.15402
'Tapbpl'	6.14438	5.81363	6.45717	6.67008	6.52293	6.60115	6.77451	5.50854	5.05567
'Plac8'	8.83045	8.57095	8.62091	8.75382	8.96322	8.91401	9.01012	8.3877	7.96338
'Cox6b2;Fam71e2'	5.12622	5.25188	4.98931	4.82502	6.04377	4.80236	5.23868	3	3.63058
'Ppargc1b'	4.3109	3.98566	4.11159	4.3074	5.15589	4.40445	4.49291	3.25734	3.10272
'Idh3a'	5.89307	6.06529	6.23256	5.55902	5.32131	5.61593	5.33796	4.91224	5.21156
'Nudt9'	7.48471	7.40264	7.53591	7.19249	6.45333	6.77576	6.7142	6.0829	6.49484
'Pnp'	7.07487	7.14971	6.85688	6.48978	6.04377	6.1526	6.45882	5.50854	5.99142
'Rhd'	7.94815	8.07574	8.10412	7.5752	7.07974	6.89702	6.89894	6.0829	6.91346
'Tcf19'	5.37582	5.83463	5.61339	5.06488	4.75427	5.03154	4.97644	4.53988	4.45111
'Kif20b'	4.87143	4.85969	5.02983	4.53715	4.50189	5.19183	5.36959	3.49501	3.63058
'Cyc1'	7.48471	7.66542	7.79882	7.32141	7.40876	6.81322	7.03337	6.74377	6.46416
'Tuba1b'	7.77275	7.89265	8.10412	7.68711	7.48049	7.30026	7.10088	6.89673	6.77033
'Gas5;Snord47'	4.44178	4.59019	4.61619	4.98927	4.50189	4.75181	5.27254	3.8777	3.39066
'Epb4.2'	6.12503	5.99243	5.31857	5.13673	4.96901	5.11391	5.23868	4.64236	4.17619
'Nudt4'	6.42315	6.43883	6.16139	6.04317	5.60424	6.00932	6.12994	5.50854	5.41775
'Ppp1r2'	5.04619	4.90009	4.56196	4.17716	4.50189	4.64505	4.17264	3.8777	3.63058
'Jun'	6.18232	5.6808	5.94539	6.34564	6.38019	6.51283	6.90974	4.91224	5.28362
'Gtf3c5'	5.64397	5.7707	5.81234	5.20516	5.15589	4.94419	4.8476	4.73804	4.78483
'Guca1a'	4.3109	4.63875	3.86515	5.06488	4.75427	4.98853	4.89184	3.25734	3.63058
'Kctd17'	4.16695	4.25851	3.86515	4.42685	4.96901	4.40445	4.54924	3.699	3.39066
'Socs3'	5.82275	5.63366	5.69124	6.11608	6.82803	6.19105	6.35203	5.27328	4.97092
'Rfc1'	6.35834	5.93526	6.08653	6.28369	6.71361	6.61535	6.62528	5.84575	5.70694
'Prdx4'	5.4082	5.22032	5.53109	4.7353	4.1958	4.64505	4.49291	4.42957	3.63058
'Ppp2r1b'	5.4082	5.63366	5.53109	4.82502	5.15589	4.46847	4.70612	4.53988	4.68194
'Hspe1'	6.9263	7.03647	6.97573	6.21896	5.94579	6.48214	6.36778	6.15401	6.22893
'1700021K19Rik;mKIAA0226'	6.35834	6.50581	6.55759	6.46208	6.22176	6.3181	6.07345	7.09046	7.10461
'Cfp'	6.62947	7.08108	6.59858	6.71771	6.58933	6.43486	6.39877	7.74856	7.82536
'Bpgm'	6.55912	6.27951	6.30038	6.315	6.04377	5.26575	5.57347	7.62885	7.89602
'Gba2;mKIAA1605'	4.3109	4.37774	4.11159	4.17716	4.1958	3.7539	3.93963	4.73804	4.97092
'Mkrn1'	7.90909	7.89265	7.7081	7.62601	7.54883	7.23735	7.31908	8.31198	8.81611
'Clec4n'	5.4082	5.48222	4.90468	5.333	4.96901	4.94419	4.6557	6.37846	6.11506
'Tcn2'	5.04619	4.77533	4.50561	4.42685	4.50189	4.52976	3.76036	5.92921	5.90268
'5730469M10Rik'	4.77541	5.12127	5.02983	5.06488	4.50189	4.69942	5.01695	5.92921	6.66636
'Atp2a3'	6.39111	6.55724	6.68991	6.83033	6.22176	6.40245	6.28726	7.5119	7.90747
'Fmnl3'	4.77541	4.77533	4.76763	4.98927	4.50189	4.75181	4.60345	5.45322	5.54047
'Yipf4'	3.82715	4.25851	4.38584	4.03399	3.80676	4.03327	4.02155	5.20794	5.35224
'Abcg3'	4.82421	5.05124	4.81478	5.13673	4.75427	4.89844	4.97644	6.31781	6.69307
'Id3'	6.00315	5.79232	5.74091	5.75437	5.60424	5.82599	5.97407	6.85466	7.21928
'Cd79b'	9.18832	8.77481	9.21787	8.93098	9.06006	9.12236	8.99752	9.9747	9.86529
'Ptprcap'	8.35343	8.13619	8.2824	8.05476	8.44093	8.28683	8.23092	9.16228	8.97688
'Fgd2'	6.23742	6.30982	6.3809	6.15119	6.13551	6.40245	6.21945	6.93762	7.21928
'Inf2'	5.5309	5.42799	5.44381	5.39291	5.32131	5.72478	5.27254	6.18829	6.40078
'Trpm2'	5.3088	4.90009	5.02983	4.90948	4.96901	5.26575	4.93476	5.88808	5.90268
'Gramd1a'	6.16347	6.3395	6.4119	6.59555	6.30315	6.33537	6.12994	7.03502	7.34247
'Sh2d3c'	5.84657	5.91568	5.78892	6.315	5.84068	5.75076	5.72787	7.03502	7.00156
'Apoe'	7.18175	6.88368	6.36515	7.14101	7.37151	6.41875	6.63832	9.39658	9.49223
'Axl'	6.51521	6.06529	6.10562	6.25169	6.38019	6.2099	5.86734	7.83765	8.10931
'Tmem176a'	4.67254	4.43386	4.50561	4.7353	4.75427	4.33747	4.43429	5.45322	5.75842
'C1qa'	7.85726	8.11489	7.87864	7.74572	8.12004	7.66373	7.68862	8.95389	9.2708
'Fcna'	5.77389	6.10039	5.06924	5.79934	5.94579	4.58856	5.33796	8.19039	8.70242
'Sepp1'	5.98179	6.04742	5.78892	5.9264	5.84068	5.36998	5.84501	7.27724	7.47148
'Trf'	5.64397	5.6095	4.98931	4.90948	6.13551	4.8512	4.89184	8.03894	8.21443
'Slpi'	6.02419	5.99243	6.30038	6.21896	5.94579	5.77627	6.09252	7.14384	7.35925
'Cd81'	7.57303	7.43737	7.38789	7.56221	7.58182	7.35209	7.16538	8.23207	8.2598
'Ptp4a3'	7.62217	7.26247	7.20535	7.22581	7.37151	7.29144	7.08191	8.13873	8.11919
'Igf1'	4.91714	5.34262	4.44697	4.7353	4.75427	4.40445	4.97644	6.18829	6.81964
'Arhgef1;mFLJ00369'	8.00747	8.2303	8.08982	7.9085	8.24887	8.36879	8.26496	9.0961	9.16509
'Rabggta'	4.44178	4.53994	4.32201	4.42685	4.50189	4.64505	4.60345	5.1395	5.35224
'Ephx1'	5.87	5.91568	6.00758	5.88528	5.94579	6.05173	6.28726	6.87585	6.84367
'Fcer2a'	6.62947	6.32473	6.73962	6.69409	6.65281	6.81322	6.8324	7.88022	7.81324
'Specc1l;mKIAA0376'	4.56177	4.85969	4.94761	4.90948	4.96901	5.07331	5.16849	6.04598	5.85618
'Bin1'	7.25478	7.01823	7.16953	7.22581	7.44507	6.9315	7.278	8.03894	8.05887
'Il16;mKIAA4048'	7.74132	7.23904	7.73898	7.60083	7.79378	7.53511	7.61796	8.35788	8.39606
'Foxo1'	7.3243	7.14131	7.62457	7.33674	7.76534	7.53511	7.71348	8.4943	8.41222
'Ralgps2'	6.48517	6.42505	6.73962	6.59555	7.03279	6.7373	6.78628	7.6536	7.40842
'Skap1'	5.27409	5.28277	5.4735	5.333	5.84068	5.43551	5.72787	6.43666	6.15402
'Siglecg'	6.79778	6.35411	6.75179	6.62082	7.07974	7.10263	6.94165	7.85909	7.81324
'Rgl2'	6.16347	5.79232	6.16139	6.18548	6.30315	6.17195	6.20199	6.87585	6.84367
'Hmha1'	7.96457	7.89265	8.04604	7.9786	8.26927	8.36879	8.16486	8.9932	9.04584
'Spib'	7.93154	7.56848	7.79882	7.82397	8.24887	7.83742	7.81461	8.76805	8.80392
'Tbc1d10c'	7.58724	7.51095	7.73286	7.65076	8.05103	7.5647	7.66969	8.39505	8.66918
'Hfe'	3.72803	3.64887	3.45325	4.03399	4.1958	3.40712	3.85278	4.82777	5.35224
'Arhgef18'	6.34168	5.89584	6.48658	6.08008	6.30315	6.17195	6.14829	6.95763	7.29096
'Calhm2'	4.82421	4.37774	4.81478	4.7353	5.15589	4.52976	4.43429	6.0829	5.85618
'Rhoh'	5.79852	5.50859	5.94539	5.66	5.94579	5.55826	5.57347	6.51978	6.52488
'Cnn2'	7.58016	7.39559	7.62457	7.53588	8.02727	7.69082	7.69488	8.24841	8.60031
'Man2b1'	6.77313	6.77925	6.81111	6.69409	7.33327	6.81322	7.05299	7.6536	7.78869
'Cr2'	6.55912	6.21692	6.57138	6.64566	6.88201	6.38597	7.16538	7.71368	7.73829
'Adamts10'	4.77541	4.73122	5.21694	5.13673	5.15589	5.07331	4.97644	5.84575	6.07501
'Itpr3'	5.61652	5.74874	5.71629	6.04317	6.04377	5.82599	5.72787	6.78916	6.81964
'Arhgap25;mKIAA0053'	6.65668	6.38291	6.26687	6.46208	6.77196	6.77576	6.84371	7.29307	7.37582
'Galnt6'	5.08676	4.97764	4.61619	5.13673	5.32131	5.26575	5.46051	6.15401	6.30014
'Ccm2;AK040177'	7.76026	7.45103	7.78705	7.9085	7.95356	7.7755	7.83741	8.21554	8.45186
'Cbx7'	5.69735	5.74874	5.66576	6.21896	5.60424	5.75076	5.82233	6.62365	6.89057
'Gm2058;Ube2h'	5.72332	5.99243	5.83538	5.9264	5.32131	5.49819	5.82233	6.59837	6.55431
'Hmox1'	8.06951	8.35179	7.88418	8.20436	7.44507	7.89679	7.93577	9.12294	9.35682
'Lpla2;Pla2g15'	5.12622	5.25188	5.18141	5.39291	4.1958	4.46847	5.16849	6.78916	6.98003
'Vcam1'	5.16463	5.79232	5.44381	5.50575	4.1958	5.36998	5.60038	7.26122	7.48682
'Klhl6'	5.56001	5.97362	5.85806	6.11608	6.22176	6.22851	6.16642	6.91732	6.81964
'Timp2'	4.44178	5.01491	4.81478	5.20516	5.60424	5.22926	5.20402	6.6729	6.71928
'Tgfbr2'	6.14438	5.89584	5.92405	5.79934	5.84068	6.1526	6.27061	6.83315	6.91346
'Nfkbid'	5.12622	4.73122	4.86043	5.2705	4.75427	5.07331	5.33796	6.37846	6.11506
'Nrm;2310014H01Rik'	7.12444	7.08984	7.36432	7.17553	7.12521	6.9315	7.13809	8.17337	7.87285
'Rasgrp2'	6.58768	6.47939	6.26687	6.71771	7.25361	6.87357	6.73862	7.59091	7.82536
'A930005H10Rik'	4.61821	4.68573	4.32201	4.63962	4.96901	4.64505	4.49291	5.71075	5.41775
'AK020764;Mir142'	5.47085	5.313	5.61339	5.9264	6.04377	5.77627	5.13207	6.99684	6.74503
'Sun2'	6.12503	6.06529	6.0476	6.54363	6.52293	6.11309	6.03451	7.21208	6.98003
'Akr7a5'	5.3427	5.45536	5.28548	5.66	5.94579	5.46719	5.30562	6.28651	6.26498
'Tcb;TCRB13-1-1;TCRB5'	8.15308	8.01266	8.20046	7.79095	8.30922	8.21401	8.35066	8.99804	8.87561
'Pde2a'	4.67254	5.18805	5.28548	4.98927	5.60424	4.98853	4.70612	6.64849	6.30014
'AK150559;Klf7'	5.23852	5.05124	4.86043	5.88528	5.84068	5.33607	5.91098	6.28651	6.33447
'Bcl9l'	5.64397	5.18805	5.18141	6.00529	6.38019	5.82599	5.86734	6.34845	6.81964
'Abca2;Mir3087'	4.91714	4.90009	5.44381	5.39291	5.4697	5.67138	5.62679	6.62365	6.11506
'Gpr183'	5.4082	5.48222	5.61339	5.70796	5.60424	5.94327	6.11136	6.76664	6.46416
'Ccr1'	4.0892	4.05886	3.95206	4.17716	4.75427	4.40445	4.75484	4.91224	5.05567
'Cxxc5'	5.82275	5.7038	5.98714	6.04317	6.77196	6.35243	6.41402	6.89673	7.10461
'Map4k2'	6.40722	6.10039	6.26687	6.40503	6.88201	6.67083	6.50227	7.14384	7.08458
'Pra1;Rabac1'	6.90377	6.88368	6.72735	7.14101	7.54883	7.09251	7.06269	7.84841	7.6319
'Ddit4'	5.12622	4.43386	4.61619	5.20516	5.60424	5.26575	5.62679	5.80214	6.07501
'Gimap9'	5.16463	4.77533	5.10761	5.39291	5.4697	5.36998	5.57347	5.80214	5.75842
'Gimap3'	5.91576	5.65742	6.21509	6.59555	6.38019	6.40245	6.75069	6.99684	6.936
'Chd3'	6.83398	6.6069	6.93363	7.17553	7.37151	7.20012	7.29457	7.88022	7.89602
'Ell3'	3.91989	3.55078	3.86515	4.17716	4.1958	4.03327	4.30939	4.82777	4.57113
'Zbtb4'	5.58854	5.28277	5.61339	6.25169	6.13551	6.07248	6.16642	6.78916	6.69307
'Prkcb'	7.68298	7.38851	7.48582	7.76851	7.48049	7.73703	8.10504	8.44553	8.55736
'Fam40a'	4.82421	5.313	4.76763	4.82502	5.15589	5.15339	4.89184	5.88808	5.85618
'Fbxl12'	4.56177	4.63875	4.32201	4.03399	4.50189	4.58856	4.37319	5.45322	5.21156
'Sfxn2'	4.67254	4.31936	4.44697	4.03399	3.80676	4.33747	4.43429	5.33579	5.28362
'Slc44a2'	5.79852	5.48222	5.92405	5.55902	5.15589	5.40312	5.46051	6.6729	6.30014
'Gm11346'	4.16695	4.05886	4.32201	4.42685	3.80676	4.75181	4.49291	5.45322	5.54047
'Lck'	6.89237	7.2547	7.34036	6.9548	7.16929	7.23735	7.24427	8.01048	7.82536
'Bcr'	3.91989	4.19498	4.03403	4.82502	4.50189	4.46847	4.43429	4.91224	5.54047
'Plekhg2;Clg'	4.77541	4.59019	4.81478	5.55902	5.15589	5.22926	5.46051	5.84575	6.49484
'Marcks;AK017779'	7.82764	7.33793	7.51466	7.88783	8.00312	7.99786	8.08613	8.28847	8.70898
'Dennd1c'	6.06538	5.58492	5.96642	6.25169	6.52293	6.81322	6.84371	6.85466	7.21928
'Map3k3'	6.02419	5.85532	5.94539	6.34564	6.52293	6.35243	6.67676	6.4926	6.936
'Sh2d2a'	4.72489	4.59019	4.81478	5.333	5.15589	5.26575	4.97644	5.75717	5.41775
'Rassf2'	4.0892	4.63875	4.50561	4.82502	5.15589	5.55826	5.27254	5.61319	5.59812
'2810453I06Rik'	4.37782	4.31936	4.66846	4.17716	3.27245	3.40712	3.66161	5.1395	5.90268
'Glul'	6.08554	6.10039	5.94539	5.66	5.4697	5.94327	5.54605	6.34845	6.89057
'Kcnj10'	3.91989	4.48787	4.18519	3.25479	3.80676	3.27015	3.93963	5.33579	4.97092
'Ndst1'	4.37782	4.31936	4.61619	5.333	4.96901	5.67138	5.84501	5.84575	5.59812
'Dapl1'	3.72803	3.90854	3.77267	4.3074	4.96901	4.40445	4.8476	4.99204	4.68194
'Nckipsd;AK217931'	4.24072	3.90854	4.11159	4.63962	4.75427	5.11391	4.70612	4.53988	4.45111
'Rbbp6'	6.23742	6.11763	6.44224	6.9548	6.88201	7.33502	7.47987	6.57265	6.74503
'Slfn2'	7.43057	7.18283	7.11407	7.74572	8.14232	7.90259	8.04265	7.74856	7.82536
'Tm6sf1'	3.91989	3.64887	3.67385	4.82502	4.50189	4.64505	5.05635	4.31011	4.78483
'Sfrs12ip1;Srek1ip1'	5.04619	4.73122	4.94761	5.45043	5.94579	5.52854	5.57347	4.91224	4.88087
'Ublcp1'	3.91989	4.37774	3.95206	4.63962	4.75427	4.80236	4.97644	4.31011	4.0162

## Sheet: supplementary file 1e
Table S5: Training induced significant DEGs (10% FDR) in total splenocytes, between naive and trained mice, with and without Fedratinib inhibition. Values are log2-ratio expression per replicate. Replicates are marked at the end of the sample name.
Gene names	PBS_DMSO_1	PBS_DMSO_2	PBS_DMSO_3	PBS_Fed_1	PBS_Fed_2	PBS_Fed_3	BCG_DMSO_1	BCG_DMSO_2	BCG_DMSO_3	BCG_DMSO_4	BCG_Fed_1	BCG_Fed_2	BCG_Fed_3	BCG_Fed_4	BCG_Fed_5	BCG_Fed_6
'Cxcl10'	5.47142	5.54744	5.68354	5.50313	5.4527	5.56067	9.23145	8.83829	9.2542	8.86488	7.02242	8.01506	7.32202	7.65156	7.22511	7.58743
'Fam26f'	6.61206	6.83236	6.46908	6.57924	6.50573	6.80576	8.68876	8.66833	8.81118	8.62498	7.47142	8.15157	7.81005	8.04984	7.64083	7.82884
'Gbp5;Gbp1'	4.86983	5.57717	4.83779	5.0672	4.55259	5.05913	8.10738	8.16891	8.35183	7.73703	6.16163	7.32864	6.48482	6.94177	6.76312	6.93387
'Gbp2'	7.13112	7.21931	7.13734	6.80585	7.00356	7.14878	10.688	10.5138	10.647	10.664	8.7785	9.83579	9.55027	9.12259	9.07095	9.16739
'Zbp1'	7.06746	7.29282	7.06162	7.20326	6.85146	7.28323	9.30773	9.38765	9.16139	9.39398	8.23652	8.85229	8.497	8.39752	8.19527	8.55295
'Cxcl9'	6.05648	6.11196	5.9447	6.07745	5.71024	5.53694	10.0342	9.99962	10.2186	9.66148	7.87448	8.89614	8.49298	8.69406	8.21407	8.26353
'Igtp;Irgm2'	8.50007	8.34116	8.1867	8.26227	8.36393	8.37543	10.6133	10.4549	10.5387	10.5901	9.43265	10.116	9.59789	9.37751	9.24248	9.73564
'Smpdl3b'	4	4.28553	4	4	4.09155	4.22569	6.98052	6.63641	6.46312	6.79484	5.44612	6.3876	5.53255	5.32434	5.74221	5.68096
'Nod1'	7.15173	7.23804	7.18571	7.39287	7.09671	7.22501	8.07395	8.10796	8.26311	8.22983	7.69971	7.9049	7.67448	7.78144	7.70424	7.71009
'Socs1'	6.45507	6.66248	6.31454	6.48714	6.57212	6.35486	8.96587	8.35685	8.8436	9.09619	7.28135	8.04653	7.6602	7.50882	7.70424	7.82313
'Irf1'	8.61586	8.58015	8.36529	8.56788	8.76255	8.7348	10.5233	10.4933	10.4799	10.7229	9.67099	10.0082	9.75401	9.41802	9.60486	9.34328
'Psmb9'	8.98952	8.97576	9.03876	8.9246	8.73021	9.08293	10.3596	10.5631	10.2409	10.4774	9.60263	9.83279	9.81975	9.82062	9.745	9.83972
'Gm12250'	6.31589	6.28408	6.23633	5.87429	5.90312	6.40815	8.94752	9.05926	8.63718	8.62498	7.39002	8.02035	7.46857	7.56401	8.26303	7.75877
'Stat1'	9.72478	9.92171	9.66872	9.8694	9.60115	9.89353	11.6944	11.6138	11.5847	11.8073	10.7599	11.2174	11.0508	10.7835	11.2476	10.7095
'Il18bp'	4.18151	4.71799	4	4	4	4	6.35871	7.17931	6.46312	6.17841	4.97387	5.65665	5.56358	5.59556	5.67145	5.82508
'Dtx3l'	8.09969	8.11155	7.87636	8.24831	7.97969	8.23869	9.49619	9.53804	9.32896	9.33052	8.53518	8.73162	8.90095	8.84282	9.03968	8.98505
'Nlrc5'	7.07827	7.37974	7.2325	7.30117	7.09671	7.60187	8.79858	8.52734	8.70611	8.49978	7.91869	8.18966	8.17406	7.73409	7.93322	7.84584
'Tap1'	9.16959	9.32147	9.53745	9.22113	9.25968	9.49832	10.571	10.3936	10.4818	10.6328	9.94482	10.1441	10.2125	9.78622	9.81644	9.78348
'Gbp10;Mpa2l;Gbp6;Gbp4'	7.93108	8.43751	8.07879	7.78011	7.91081	8.22762	10.6526	10.7415	10.5637	10.3678	8.99699	9.69394	9.21375	8.97088	9.61668	9.34925
'Tgtp2;Gm12185'	4	4	4	4.1096	4	4	6.41319	6.74228	6.43245	6.69085	4.91689	5.57267	5.05331	4.87835	5.70726	5.60311
'Wars'	6.97796	7.28384	7.03546	6.86194	6.95462	6.93847	8.95672	8.79676	8.6737	8.93484	7.53906	8.39921	8.17406	7.52745	7.71307	7.90651
'Trafd1'	7.34311	7.37974	7.34857	7.26002	7.34476	7.44497	8.3124	8.89186	8.38825	8.67353	7.83658	7.9883	7.90397	8.08171	7.8395	8.13113
'9030625A04Rik'	5.25987	5.32016	5.2325	5.12945	5.30435	5.27533	6.90649	6.63641	6.62106	6.28939	5.97884	6.11817	5.70945	5.88285	5.93581	5.97682
'Cd274'	5.47142	6.02833	5.88737	5.59425	5.8771	6.10345	7.71773	7.32275	7.63407	7.48056	6.44971	6.91659	6.36663	6.39007	6.8932	6.98591
'Il1rn'	4.91875	5.35491	4.45928	4.70783	4.48527	4	7.17174	6.86791	6.85876	6.8197	5.2753	6.21368	5.59396	5.52313	5.77634	5.77862
'Psmb10'	7.88873	8.05984	7.99984	8.11618	8.18986	7.99487	9.17739	9.50619	9.17767	9.63721	8.70467	9.01757	8.81652	9.04064	8.74021	8.74641
'Dnase1l3'	8.74016	8.63772	8.81105	8.79615	8.58503	8.58375	9.7162	9.84692	9.75948	9.77391	9.21061	9.3991	9.4645	9.6757	9.43635	9.40766
'Serpina3f;Serpina3g'	7.7671	7.7432	7.62774	7.98763	7.53985	7.56128	10.4804	10.502	10.6047	10.7113	9.24284	10.1344	9.99075	9.86891	9.49132	9.78788
'IIGP;Iigp1'	5.53557	5.96227	5.36442	5.45532	5.55474	5.53694	10.0628	10.2133	10.1377	9.77073	7.92593	9.44115	8.70265	8.27605	8.84843	9.1005
'Ubd'	5.62673	4.13375	4.24778	4.86247	4	4	7.44012	7.74284	7.85254	7.64263	5.56215	6.87044	6.66731	6.65024	6.46138	6.80072
'Anxa4'	4.81919	5.05027	4.77595	4.93399	4.34041	4.39364	6.22296	6.45253	6.52257	5.97206	5.36323	5.60121	5.43524	5.76217	5.70726	5.30834
'C3'	6.42152	6.80749	6.0133	6.43879	6.30563	6.10345	7.80181	8.31333	8.24116	8.08351	6.68972	7.07759	7.64577	7.52745	7.12273	7.12238
'Cdkn1a'	4.59672	5.17217	4.29263	4.62381	4.90144	4.28388	6.868	7.36124	6.83551	6.74378	4.79569	5.92849	5.29436	5.52313	5.80967	5.5762
'Mefv'	4.18151	4.82098	4.20148	4.78722	4.34041	4.10177	6.13924	6.48775	6.00223	6.09937	4.97387	5.38845	4.96309	5.09372	5.20448	4.8503
'Tnfaip2'	7.3959	7.15176	7.02885	7.32797	7.14113	6.69218	9.07127	9.82643	9.13067	9.22743	7.5008	8.29823	7.75734	8.18509	8.02123	8.06975
'Ly6i'	4	4	4	4	4	4	7.02785	7.81395	7.20567	6.76953	4.26719	5.51384	4.65268	4.47957	5.15346	5.5762
'Cfb;C2'	5.1412	5.82032	5.48527	5.54941	4.90144	5.71667	8.68507	9.39695	9.08703	8.79763	6.11173	7.28533	6.87948	7.04884	6.39704	6.40153
'Rnf213;AK217856'	8.03459	8.38384	8.0133	8.04528	8.07436	7.98613	9.04851	9.08823	8.99558	9.185	8.30474	8.30258	8.62019	8.42759	8.48044	8.301
'Stat2'	7.62692	7.55432	7.61455	7.46707	7.39147	7.50735	8.62479	8.75038	8.547	8.76599	7.66552	7.83452	7.8357	7.85705	8.03539	7.8174
'Batf2'	4	4	4	4	4	4	6.0731	6.69786	6.00223	5.7312	4	5.4525	4.46821	4	4	4.10171
'Irg1'	4	4.13375	4	4	4	4	6.96844	7.04387	6.75103	6.45726	4.07222	5.83545	4.40107	4	4.50968	4.89454
'Procr'	4	4	4	4	4	4	6.05037	6.75679	6.67446	5.7827	4.66337	5.01697	4.17861	4.81908	4.03333	4.70881
'Sod2'	7.46341	7.39652	7.47557	7.6481	7.53153	7.54947	8.70705	8.95929	8.87245	8.70724	7.74951	7.96103	7.70959	7.9839	7.2617	7.81164
'Mmp14'	4	4	4	4	4	4	6.4484	7.68331	6.90418	5.88049	4	5.01697	4.00862	4.75727	4.80242	4
'F10'	4	4.42286	4	4	4	4	5.80079	6.32201	5.93818	5.83242	4.173	4.92965	4.91578	4.22941	4.92916	4
'Samhd1'	10.2977	10.0871	10.4587	10.4554	10.4724	10.3646	11.7104	11.8313	11.7011	11.8696	10.8979	11.1489	11.1372	10.7442	11.0155	10.4801
'Ssbp2;AK039140'	4.01151	4	4	4	4	4.03558	5.56448	6.66746	5.91617	6.32456	4	4.32318	4.81622	4	5.04566	4.37585
'Csf1'	5.09937	5.6063	5.18571	4.33769	5.41702	5.05913	7.35917	6.74228	6.88165	6.89183	5.80132	5.88272	5.98632	5.4855	5.77634	5.40327
'Insl6'	4.86983	5.09206	4.86774	4.33769	4.61691	4.84394	6.05037	6.08957	6.00223	6.09937	5.56215	5.25111	4.86685	5.32434	5.25375	5.49232
'Parp14'	7.81957	8.07555	7.77331	7.47908	7.8452	7.82402	8.79516	8.59754	8.64723	8.64599	8.23068	8.36633	7.87334	8.1733	8.13737	8.13574
'Tbkbp1'	4.7667	5.54744	4.74401	4.5346	5.13899	4.59091	6.46569	6.15677	6.36908	6.21636	5.48584	5.51384	5.59396	5.23647	5.39222	5.62953
'A630055G03Rik'	4.47114	4.86985	4.83779	4.22815	4.90144	5.09208	6.20248	6.97107	6.47821	6.13943	5.40527	5.57267	4.70928	5.14289	5.15346	5.60311
'Parp11'	5.50385	5.84497	5.81234	5.45532	5.92869	5.65187	6.48277	6.81342	6.5936	6.69085	6.06003	6.09828	5.98632	5.5598	5.93581	6.35479
'1600014C10Rik'	6.62685	6.98433	6.47881	6.46317	6.28598	6.65959	7.50844	7.55635	7.25032	7.62863	6.62003	6.8468	7.21858	6.81098	6.82963	6.77728
'H1f0;Icam1'	7.40451	7.91019	7.49009	7.44276	7.00356	7.4765	8.58579	8.95929	8.30604	8.6108	7.77378	7.85836	7.64577	7.90059	7.81509	7.58068
'Sp140'	5.59698	5.63485	5.82766	5.24645	5.30435	5.73764	6.4484	6.58854	6.23332	6.57878	5.95073	6.07812	5.96324	5.69782	6.10647	5.77862
'1200002N14Rik;Dram1'	4.81919	4	4	4.4395	4.26213	4.22569	6.30209	6.22097	6.36908	5.83242	4.59237	5.51384	5.43524	4.55417	5.43557	5.24141
'Prdx1'	8.56298	8.37541	8.45188	8.63916	8.31145	8.53965	9.35721	9.16911	9.18918	8.94052	8.49194	8.77611	8.76071	8.78592	8.86438	8.82281
'Clec4e'	4.91875	4.71799	4.6437	4.93399	5.0486	4.54407	6.84175	6.32201	7.19657	6.21636	5.13244	5.65665	5.36652	5.23647	5.43557	5.93507
'Ccrl2'	4.25955	4.28553	4	4	4.61691	4.22569	6.24315	6.30236	6.04341	6.25333	4	5.35532	4.65268	5.28107	4.86718	5.5762
'Pla2g7'	7.51205	7.47758	7.34857	7.09821	7.27671	7.25441	8.21353	8.10229	8.36407	7.8133	7.4108	7.64877	7.69565	7.66845	7.41035	7.43851
'Tor3a'	7.3959	7.56919	7.35915	7.17402	7.11909	7.54947	7.95044	7.77883	7.7813	7.977	7.5008	7.61418	7.579	7.63447	7.55497	7.55334
'Jun'	5.71247	6.50124	5.48527	5.72097	5.71024	6.5453	7.2832	7.13556	7.43958	7.41679	5.89281	6.33759	6.15881	6.28448	6.63879	6.38612
'Ly6a'	9.01506	8.4171	9.10941	9.1665	8.95523	9.05605	10.5968	10.4527	10.5133	10.7262	9.77686	10.0267	10.0412	9.94192	9.33411	9.18753
'Oas2'	5.87004	5.57717	5.9447	6.04552	5.68045	5.9138	6.868	7.37071	6.84718	7.20662	6.25655	6.01588	6.59406	6.0976	5.84225	5.89207
'Sbno2;Sno'	7.20201	7.05998	7.24967	7.44276	7.24653	7.1091	8.03973	8.20639	7.73178	8.00979	7.17601	7.36238	7.58657	7.61717	7.5745	7.14087
'Tmem2'	4.71224	5.21061	4.92584	5.35466	5.38043	5.24636	6.13924	6.19988	6.02297	5.97206	5.5245	5.65665	5.53255	5.4855	5.77634	5.40327
'Atp5k'	6.95468	6.57677	6.71957	6.89815	6.52262	6.97425	7.36839	7.77883	7.43185	7.57121	6.8505	7.15664	7.04254	7.00961	6.62012	7.19493
'5133401N09Rik'	6.85765	6.88085	6.89708	6.41399	6.4182	7.0683	7.56569	7.90796	7.39255	7.57121	6.58388	7.23157	6.842	6.68385	6.44025	6.94443
'H2-DMb1;H2-DMb2'	8.71268	8.61997	8.68844	8.38219	8.26705	8.79355	9.0909	9.27119	9.12109	9.0391	8.35386	8.77611	8.6745	8.46674	8.54124	8.58368
'Clcn7'	7.0234	6.95066	6.9187	6.86194	6.4182	7.00916	7.72493	7.69089	7.81141	7.76291	7.10126	7.19459	6.9749	6.48846	6.69339	6.71696
'Ninj1'	7.42159	7.20033	7.09365	7.01819	7.15202	7.28323	7.91312	7.87508	7.82918	7.69733	6.92464	7.09776	7.42699	7.03588	6.76312	7.31373
'AK088937'	5.05629	4.91711	4	5.24645	5.0012	4.28388	6.32121	7.32275	7.08268	6.93799	5.59884	4	4.91578	4	6.20997	4.55191
'Itgal'	5.43825	5.42198	5.57878	5.35466	5.0486	5.12428	5.8803	6.13472	5.89383	6.09937	5.18165	5.09932	5.56358	5.52313	5.70726	5.17121
'Cmklr1'	4.81919	5.42198	4.95404	4.1096	4.41466	4.76443	5.80079	5.99482	5.93818	5.7312	5.40527	4.57416	5.40129	5.14289	4.98859	4.70881
'Atm'	6.7264	7.10149	6.98169	6.66582	7.09671	6.95647	7.66632	7.91444	7.49999	7.48056	6.91011	6.98316	6.9978	6.87058	7.47412	6.82378
